# Supplementary material for: A Mouse-Based Method to Monitor Wheat Allergens in Novel Wheat Lines and Varieties Created by Crossbreeding: Proof-of-Concept Using Durum and A. tauschii Wheats
Source: MDPI journal article supplement (doi:10.3390/ijms23126505), 2022-06-10
Supplement: s1 [file s1]

**Table S4.** Peptides sequences, positions, and coverage for wheat allergens identified in native tauschii wheat.

| IgE-binding band | Protein                                        | Sequence                         | Position | Percent coverage |
|------------------|------------------------------------------------|----------------------------------|----------|------------------|
| DN1              | Globulin-3A [Triticum aestivum]                | AFVVPGLTDADGVGYVAQGEGVLTVIENGEK  | 182-212  | 33.50%           |
|                  |                                                | AFVVPGLTDADGVGYVAQGEGVLTVIENGEKR | 182-213  | 33.50%           |
|                  |                                                | ALRPFDEVSR                       | 154-163  | 33.50%           |
|                  |                                                | DTFNLLEQR                        | 339-347  | 33.50%           |
|                  |                                                | DTFNLLEQRPK                      | 339-349  | 33.50%           |
|                  |                                                | EVQEVFR                          | 535-541  | 33.50%           |
|                  |                                                | FQYFSAK                          | 257-263  | 33.50%           |
|                  |                                                | FQYFSAKPLLASLSK                  | 257-271  | 33.50%           |
|                  |                                                | LAVVLEGEVEIVCPHLGR               | 397-416  | 33.50%           |
|                  |                                                | LYEADAR                          | 357-363  | 33.50%           |
|                  |                                                | QASEGDQGHHWPLPPFR                | 318-334  | 33.50%           |
|                  |                                                | QGDVIVAPAGSIMHLANTDGR            | 219-239  | 33.50%           |
|                  |                                                | RPYVFGPR                         | 132-139  | 33.50%           |
|                  |                                                | SDHGFVK                          | 147-153  | 33.50%           |
|                  |                                                | SFHALAQHDVR                      | 364-374  | 33.50%           |
|                  |                                                | VAIMEVNPR                        | 173-181  | 33.50%           |
|                  |                                                | VAVANITPGSMTAPYLNTQSFK           | 375-396  | 33.50%           |
| DN2              | Dehydroascorbate reductase [Triticum aestivum] | AAVGHPDTLGDCPFSQR                | 8-24     | 67.50%           |
|                  |                                                | AHGPYINGANISAVDLSLAPK            | 136-156  | 67.50%           |
|                  |                                                | ALVDELQALEEHLK                   | 122-135  | 67.50%           |
|                  |                                                | ENLIAGWAPK                       | 200-209  | 67.50%           |
|                  |                                                | IFSTFVTFLK                       | 102-111  | 67.50%           |
|                  |                                                | LYHLQVALEHFK                     | 157-168  | 67.50%           |
|                  |                                                | VLLTLEEK                         | 25-32    | 67.50%           |
|                  |                                                | VPETLTSVHAYTEALFSR               | 172-189  | 67.50%           |
|                  |                                                | WIADSDVITQVIEEK                  | 69-83    | 67.50%           |
|                  |                                                | WIADSDVITQVIEEKYPTPSLVTPEYASVGSK | 69-101   | 67.50%           |
|                  |                                                | YPTPSLVTPEYASVGSK                | 84-101   | 67.50%           |
|                  |                                                | AAVGHPDTLGDCPFSQR                | 8-24     | 55.70%           |
|                  |                                                | AHGPYINGANISAVDLSLAPK            | 136-156  | 55.70%           |
|                  |                                                | ALVDELQALEEHLK                   | 122-135  | 55.70%           |
|                  |                                                | IFSTFVTFLK                       | 102-111  | 55.70%           |
|                  |                                                | LYHLQVALEHFK                     | 157-168  | 55.70%           |
|                  |                                                | VLLTLEEK                         | 25-32    | 55.70%           |
|                  |                                                | VPETLTSVHAYTEALFSR               | 172-189  | 55.70%           |
|                  |                                                | YPTPSLVTPEYASVGSK                | 84-101   | 55.70%           |

|     |                                               |                           |         |        |
|-----|-----------------------------------------------|---------------------------|---------|--------|
|     |                                               | AAVGHPDTLGDCPFSQR         | 8-24    | 67.50% |
|     |                                               | AHGPLYINGANISAVDLSLAPK    | 136-156 | 67.50% |
|     |                                               | ALVDELQALEEHLK            | 122-135 | 67.50% |
|     |                                               | IFSTFVTFLK                | 102-111 | 67.50% |
|     |                                               | LYHLQVALEHFK              | 157-168 | 67.50% |
|     |                                               | VLLTLEEK                  | 25-32   | 67.50% |
|     |                                               | VPETLTSVHAYTEALFSR        | 172-189 | 67.50% |
|     |                                               | VPVYNGGDGK                | 59-68   | 67.50% |
|     |                                               | WIADSDVITQVIEEK           | 69-83   | 67.50% |
|     |                                               | YPTPSLVPPEYASVGSK         | 84-101  | 67.50% |
| DN2 | Class II chitinase [Triticum aestivum]        | GAASDYCTPSAQWPCAPGKR      | 114-133 | 39.10% |
|     |                                               | GPIQLSHNINYGPAGR          | 138-153 | 39.10% |
|     |                                               | NDGACQAK                  | 42-49   | 39.10% |
|     |                                               | RYCDILGVGYGDNLDCYNQRPFA   | 244-266 | 39.10% |
|     |                                               | TAMWFWMTAQAPK             | 176-188 | 39.10% |
|     |                                               | VPGFGVITNIINGGIECGHGQDSR  | 211-234 | 39.10% |
|     |                                               | YCDILGVGYGDNLDCYNQR       | 245-263 | 39.10% |
|     |                                               | YCDILGVGYGDNLDCYNQRPFA    | 245-266 | 39.10% |
|     |                                               | GPIQLSHNINYGPAGR          | 138-153 | 23.70% |
|     |                                               | RYCDILGVGYGDNLDCYNQRPFA   | 244-266 | 23.70% |
| DN2 | Endogenous alpha-amylase/subtilisin inhibitor | VPGFGVITNIINGGIECGHGQDSR  | 211-234 | 23.70% |
|     |                                               | YCDILGVGYGDNLDCYNQRPFA    | 245-266 | 23.70% |
|     |                                               | ADANYVLPANR               | 15-26   | 62.80% |
|     |                                               | AHGGGLTMAPGHGR            | 27-40   | 62.80% |
|     |                                               | CPLFVSQEADGQR             | 42-54   | 62.80% |
|     |                                               | DPPPVHDTDGNELR            | 1-14    | 62.80% |
|     |                                               | DPPPVHDTDGNELRADANYVLPANR | 1-26    | 62.80% |
|     |                                               | GGAWFLGATEPYHVVFVK        | 158-175 | 62.80% |
|     |                                               | HVITGPVRDPSPSGR           | 107-121 | 62.80% |
|     |                                               | LMACGDSCQDLGVFR           | 140-154 | 62.80% |
| DN2 | Endogenous alpha-amylase/subtilisin inhibitor | RCPLFVSQEADGQR            | 41-54   | 62.80% |
|     |                                               | RHVITGPVRDPSPSGR          | 106-121 | 62.80% |
|     |                                               | YSGAEVHEYK                | 130-139 | 62.80% |
|     |                                               | ADANYVLPANR               | 15-26   | 40.00% |
|     |                                               | CPLFVSQEADGQR             | 42-54   | 40.00% |
|     |                                               | DPPPVHDTDGNELR            | 1-14    | 40.00% |
|     |                                               | HVITGPVR                  | 107-114 | 40.00% |
|     |                                               | LMACGDSCQDLGVFR           | 140-154 | 40.00% |
|     |                                               | YSGAEVHEYK                | 130-139 | 40.00% |
|     |                                               | ADANYVLPANR               | 15-26   | 56.10% |

|     |                                  |                                    |         |        |
|-----|----------------------------------|------------------------------------|---------|--------|
|     |                                  | AHGGGLTMAPGHGR                     | 27-40   | 56.10% |
|     |                                  | CPLFVSQEADGQR                      | 42-54   | 56.10% |
|     |                                  | CPLFVSQEADGQRDGLPVR                | 42-60   | 56.10% |
|     |                                  | DPPPVHDTDGNELR                     | 1-14    | 56.10% |
|     |                                  | HVITGPVR                           | 107-114 | 56.10% |
|     |                                  | HVITGPVRDPSPSGR                    | 107-121 | 56.10% |
|     |                                  | LMACGDSCQDLGVFR                    | 140-154 | 56.10% |
|     |                                  | RCPLFVSQEADGQR                     | 41-54   | 56.10% |
|     |                                  | RHVITGPVR                          | 106-114 | 56.10% |
|     |                                  | RHVITGPVRDPSPSGR                   | 106-121 | 56.10% |
| DN2 | Peroxidase 1 [Triticum aestivum] | YSGAEVHEYK                         | 130-139 | 56.10% |
|     |                                  | DFFEQFGVSMGK                       | 298-309 | 43.00% |
|     |                                  | DSVVVSGGPDYR                       | 142-153 | 43.00% |
|     |                                  | DSVVVSGGPDYRVPLGR                  | 142-158 | 43.00% |
|     |                                  | EGLFVSDQDLFTNDITRPIVER             | 270-291 | 43.00% |
|     |                                  | GAVVSCADILALAAR                    | 127-141 | 43.00% |
|     |                                  | GFVQDAVR                           | 53-60   | 43.00% |
|     |                                  | GLSFDFYR                           | 34-41   | 43.00% |
|     |                                  | KDIGLAAGLLR                        | 61-71   | 43.00% |
|     |                                  | LFPRPDPTINPPFLAR                   | 219-234 | 43.00% |
| DN2 | Peroxidase 1 [Triticum aestivum] | PLGLDATDLVTISGGHTIGQAHCSSFEDR      | 190-218 | 43.00% |
|     |                                  | TPNVFDNQYYVDLVNR                   | 254-269 | 43.00% |
|     |                                  | DFFEQFGVSMGK                       | 298-309 | 43.30% |
|     |                                  | DSVVVSGGPDYR                       | 142-153 | 43.30% |
|     |                                  | EGLFVSDQDLFTNDITR                  | 270-286 | 43.30% |
|     |                                  | EGLFVSDQDLFTNDITRPIVER             | 270-291 | 43.30% |
|     |                                  | GAVVSCADILALAAR                    | 127-141 | 43.30% |
|     |                                  | KDIGLAAGLLR                        | 61-71   | 43.30% |
|     |                                  | LFPRPDPTINPPFLAR                   | 219-234 | 43.30% |
|     |                                  | PDPTINPPFLAR                       | 223-234 | 43.30% |
| DN2 | Peroxidase 1 [Triticum aestivum] | PLGLDATDLVTISGGHTIGQAHCSSFEDR      | 190-218 | 43.30% |
|     |                                  | QDVLSDLPAOSSNVPSLLALLR             | 168-189 | 43.30% |
|     |                                  | TPNVFDNQYYVDLVNR                   | 254-269 | 43.30% |
|     |                                  | DFFEQFGVSMGK                       | 298-309 | 15.40% |
|     |                                  | DSVVVSGGPDYR                       | 142-153 | 15.40% |
|     |                                  | GAVVSCADILALAAR                    | 127-141 | 15.40% |
|     |                                  | LFPRPDPTINPPFLAR                   | 219-234 | 15.40% |
|     |                                  | AEAQSVDFQTK                        | 127-137 | 47.50% |
|     |                                  | AFVEVNETGTAAATTIAK                 | 335-353 | 47.50% |
|     |                                  | ATQSDDFYLLDGSSIQTFFMYSSEEQYISSDGLK | 192-226 | 47.50% |

|     |                                   |                                         |         |        |
|-----|-----------------------------------|-----------------------------------------|---------|--------|
|     |                                   | DILPAGSIDNTTR                           | 159-171 | 47.50% |
|     |                                   | EDTSGVVLFIGHVVNPLLSS                    | 379-398 | 47.50% |
|     |                                   | LASAISSNPESTVNNAAFSPVSLHVALSLITAGAGGATR | 23-61   | 47.50% |
|     |                                   | LSAEPEFLEQHIPR                          | 261-274 | 47.50% |
|     |                                   | LVLGNALYFK                              | 172-181 | 47.50% |
|     |                                   | VAFANGVFVDASLQLKPSFQELAVCK              | 99-124  | 47.50% |
|     |                                   | YKAEAQSVDFQTK                           | 125-137 | 47.50% |
| DN2 | Serpín-N3.2 [Triticum aestivum]   | AFVEVNETGTAAATTIAK                      | 335-353 | 40.70% |
|     |                                   | DILPAGSIDNTTR                           | 159-171 | 40.70% |
|     |                                   | EDTSGVVLFIGHVVNPLLSS                    | 379-398 | 40.70% |
|     |                                   | ISLGIEASDLLK                            | 289-300 | 40.70% |
|     |                                   | LASAISSNPESTVNNAAFSPVSLHVALSLITAGAGGATR | 23-61   | 40.70% |
|     |                                   | LSAEPEFLEQHIPR                          | 261-274 | 40.70% |
|     |                                   | LSIAHQTR                                | 11-18   | 40.70% |
|     |                                   | NQLAATLGEGEVEGLHALAEQVVQFVLADASNIGGPR   | 62-98   | 40.70% |
| DN2 | Serpín-N3.2 [Triticum aestivum]   | AEAQSVDFQTK                             | 127-137 | 45.70% |
|     |                                   | AFVEVNETGTAAATTIAK                      | 335-353 | 45.70% |
|     |                                   | DILPAGSIDNTTR                           | 159-171 | 45.70% |
|     |                                   | EDTSGVVLFIGHVVNPLLSS                    | 379-398 | 45.70% |
|     |                                   | GLGLQLPFGAEADLSEMVDSMAQNLYISSIFHK       | 301-334 | 45.70% |
|     |                                   | ISLGIEASDLLK                            | 289-300 | 45.70% |
|     |                                   | LASAISSNPESTVNNAAFSPVSLHVALSLITAGAGGATR | 23-61   | 45.70% |
|     |                                   | LSAEPEFLEQHIPR                          | 261-274 | 45.70% |
|     |                                   | LSIAHQTR                                | 11-18   | 45.70% |
| DN2 | Gamma gliadin [Triticum aestivum] | LVLGNALYFK                              | 172-181 | 45.70% |
|     |                                   | YKAEAQSVDFQTK                           | 125-137 | 45.70% |
| DN2 | Serpín 3 [Triticum aestivum]      | DALLQQCSPVADMSFLR                       | 60-76   | 11.70% |
|     |                                   | AETQSVDFQTK                             | 127-137 | 49.60% |
|     |                                   | CLGLQLPFSDEADFSEMVDSMPQGLR              | 302-328 | 49.60% |
|     |                                   | IKNILPSGSVDNTTK                         | 157-171 | 49.60% |
|     |                                   | ISFGIEASDLLK                            | 290-301 | 49.60% |
|     |                                   | LASTISSNPK                              | 23-32   | 49.60% |
|     |                                   | LSAEPDFLER                              | 262-271 | 49.60% |
|     |                                   | LVLANALYFK                              | 172-181 | 49.60% |
|     |                                   | MVPQQARPPSVMDFIADHPFLLLR                | 355-379 | 49.60% |
|     |                                   | NILPSGSVDNTTK                           | 159-171 | 49.60% |
|     |                                   | QFSMYILLPEAPGGLSSLAEK                   | 241-261 | 49.60% |
|     |                                   | SAASNAAFSPVSLHSALSLAAGAGSATR            | 33-61   | 49.60% |
|     |                                   | VSSVFHQAFVEVNEQGTEAAATAIK               | 329-354 | 49.60% |

|     |                                                                              |                                       |         |        |
|-----|------------------------------------------------------------------------------|---------------------------------------|---------|--------|
|     |                                                                              | YKAETQSVDFQTK                         | 125-137 | 49.60% |
|     |                                                                              | DQLVATLGTGEVEGLHALAEQVVQFVLADASSAGGPR | 62-98   | 36.80% |
|     |                                                                              | ISFGIEASDLLK                          | 290-301 | 36.80% |
|     |                                                                              | LSIAHQTR                              | 11-18   | 36.80% |
|     |                                                                              | LVLANALYFK                            | 172-181 | 36.80% |
|     |                                                                              | MVPQQARPPSVMDFIADHPFLFLLR             | 355-379 | 36.80% |
|     |                                                                              | SAASNAAFSPVSLHSALSLLAAGAGSATR         | 33-61   | 36.80% |
|     |                                                                              | VSSVFHQAFVEVNEQGTEAAASTAIK            | 329-354 | 36.80% |
|     |                                                                              | AETQSVDFQTK                           | 127-137 | 46.60% |
| DN2 | Serin 3<br>[Triticum aestivum]                                               | CLGLQLPFSDEADFSEMVDSPMPQGLR           | 302-328 | 46.60% |
|     |                                                                              | IKNILPSGSVDNTTK                       | 157-171 | 46.60% |
|     |                                                                              | ISFGIEASDLLK                          | 290-301 | 46.60% |
|     |                                                                              | LASTISSNPK                            | 23-32   | 46.60% |
|     |                                                                              | LSAEPDFLER                            | 262-271 | 46.60% |
|     |                                                                              | LSIAHQTR                              | 11-18   | 46.60% |
|     |                                                                              | LVLANALYFK                            | 172-181 | 46.60% |
|     |                                                                              | NILPSGSVDNTTK                         | 159-171 | 46.60% |
|     |                                                                              | SAASNAAFSPVSLHSALSLLAAGAGSATR         | 33-61   | 46.60% |
|     |                                                                              | VAFANGVFVDASLLKPSFQELAVCK             | 99-124  | 46.60% |
|     |                                                                              | VSSVFHQAFVEVNEQGTEAAASTAIK            | 329-354 | 46.60% |
| DN3 | Dimeric alpha-amylase<br>inhibitor precursor, partial<br>[Triticum aestivum] | YKAETQSVDFQTK                         | 125-137 | 46.60% |
|     |                                                                              | CGALYSMLDSMYK                         | 55-67   | 94.40% |
|     |                                                                              | CGALYSMLDSMYKEHGAQEGQAGTGAFPR         | 55-83   | 94.40% |
|     |                                                                              | DCCQQLAHISEWCR                        | 41-54   | 94.40% |
|     |                                                                              | DVAAYPDA                              | 118-125 | 94.40% |
|     |                                                                              | EHGAQEGQAGTGAFPR                      | 68-83   | 94.40% |
|     |                                                                              | EVVKLTAASITAVCR                       | 87-101  | 94.40% |
|     |                                                                              | LPIVVDASGDGAYVCK                      | 102-117 | 94.40% |
|     |                                                                              | LPIVVDASGDGAYVCKDVAAYPDA              | 102-125 | 94.40% |
|     |                                                                              | LQCNGSQVPEAVLR                        | 27-40   | 94.40% |
|     |                                                                              | LTAASITAVCR                           | 91-101  | 94.40% |
|     |                                                                              | MSGPWMCYPGQAFQVPALPACR                | 1-22    | 94.40% |
|     |                                                                              | SGPWMCYPGQAFQVPALPACR                 | 2-22    | 94.40% |
| DN3 | Unnamed protein product<br>[Triticum aestivum]                               | DAVITYTEHAR                           | 69-78   | 68.00% |
|     |                                                                              | DNIQGITK                              | 25-32   | 68.00% |
|     |                                                                              | DNIQGITKPAIR                          | 25-36   | 68.00% |
|     |                                                                              | DNIQGITKPAIRR                         | 25-37   | 68.00% |
|     |                                                                              | IFLENVIR                              | 61-68   | 68.00% |
|     |                                                                              | ISGLIYEETR                            | 47-56   | 68.00% |
|     |                                                                              | ISGLIYEETRGLK                         | 47-60   | 68.00% |

|     |                                                |                 |        |        |
|-----|------------------------------------------------|-----------------|--------|--------|
| DN3 | Unnamed protein product<br>[Triticum aestivum] | KTVTAMDVVYALK   | 80-92  | 68.00% |
|     |                                                | KTVTAMDVVYALKR  | 80-93  | 68.00% |
|     |                                                | RISGLIYEETR     | 46-56  | 68.00% |
|     |                                                | RISGLIYEETRGLK  | 46-60  | 68.00% |
|     |                                                | TLYGFGG         | 97-103 | 68.00% |
|     |                                                | TVTAMDVVYALK    | 81-92  | 68.00% |
|     |                                                | TVTAMDVVYALKR   | 81-93  | 68.00% |
|     |                                                | VLRDNIQGITKPAIR | 22-36  | 68.00% |
