# Supplementary material for: A Mouse-Based Method to Monitor Wheat Allergens in Novel Wheat Lines and Varieties Created by Crossbreeding: Proof-of-Concept Using Durum and A. tauschii Wheats
Source: MDPI journal article supplement (doi:10.3390/ijms23126505), 2022-06-10
Supplement: s1 [file s1]

**Table S2.** Peptides sequences, positions, and coverage for wheat allergens identified in native tetraploid durum wheat.

| <b>IgE-binding band</b> | <b>Protein</b>                     | <b>Sequence</b>                  | <b>Position</b> | <b>Percent coverage</b> |
|-------------------------|------------------------------------|----------------------------------|-----------------|-------------------------|
| TN1                     | Globulin-3A<br>[Triticum aestivum] | AFVVPGLTDADGVGYVAQGEGVLTVIENGEK  | 182-212         | 49.80%                  |
|                         |                                    | AFVVPGLTDADGVGYVAQGEGVLTVIENGEKR | 182-213         | 49.80%                  |
|                         |                                    | AKDQQDEGFVAGPEQQQEHER            | 542-562         | 49.80%                  |
|                         |                                    | ALRPFDEVSR                       | 154-163         | 49.80%                  |
|                         |                                    | ASEEQLR                          | 307-313         | 49.80%                  |
|                         |                                    | DTFNLEQR                         | 339-347         | 49.80%                  |
|                         |                                    | DTFNLEQRPK                       | 339-349         | 49.80%                  |
|                         |                                    | EVQEVFR                          | 535-541         | 49.80%                  |
|                         |                                    | FQYFSAKPLLASLSK                  | 257-271         | 49.80%                  |
|                         |                                    | FQYFSAKPLLASLSKR                 | 257-272         | 49.80%                  |
|                         |                                    | GDSRDTFNLEQRPK                   | 335-349         | 49.80%                  |
|                         |                                    | GSAFVPPGHPVVEIASSR               | 470-488         | 49.80%                  |
|                         |                                    | GSGSESEEEQDQRYETVR               | 446-464         | 49.80%                  |
|                         |                                    | ILHTISVPGK                       | 247-256         | 49.80%                  |
|                         |                                    | ILHTISVPGKFQYFSAK                | 247-263         | 49.80%                  |
|                         |                                    | ILHTISVPGKFQYFSAKPLLASLSK        | 247-271         | 49.80%                  |
|                         |                                    | LAVVLEGEVEIVCPHLGR               | 397-416         | 49.80%                  |
|                         |                                    | LDDPAQELAFGRPAR                  | 520-534         | 49.80%                  |
|                         |                                    | LVIAKILHTISVPGK                  | 242-256         | 49.80%                  |
|                         |                                    | PFDEVSR                          | 157-163         | 49.80%                  |
|                         |                                    | PLLASLSK                         | 264-271         | 49.80%                  |
|                         |                                    | PLLASLSKR                        | 264-272         | 49.80%                  |
|                         |                                    | QGDVIVAPAGSIMHLANTDGR            | 219-239         | 49.80%                  |
|                         |                                    | QGDVIVAPAGSIMHLANTDGRR           | 219-240         | 49.80%                  |
|                         |                                    | RPYVFGPR                         | 132-139         | 49.80%                  |
|                         |                                    | RVLTAALK                         | 272-279         | 49.80%                  |
|                         |                                    | SDHGFVK                          | 147-153         | 49.80%                  |
|                         |                                    | SFHALAQHDVR                      | 364-374         | 49.80%                  |
|                         |                                    | VAIMEVNPR                        | 173-181         | 49.80%                  |

|     |                                    |                                  |         |        |
|-----|------------------------------------|----------------------------------|---------|--------|
|     |                                    | VAVANITPGSMTAPYLNTQSEFK          | 375-396 | 49.80% |
| TN1 | Globulin-3A<br>[Triticum aestivum] | VLTAALK                          | 273-279 | 49.80% |
|     |                                    | WRSEEEEDRR                       | 430-440 | 49.80% |
| TN1 | Serin<br>[Triticum aestivum]       | AEAQSVDFQTK                      | 127-137 | 51.80% |
|     |                                    | AVLLSASPPSDMDFIADHPFLIR          | 354-378 | 51.80% |
|     |                                    | DILPAGSISNTTR                    | 159-171 | 51.80% |
|     |                                    | DQLVATLGEGER                     | 62-75   | 51.80% |
|     |                                    | EDTSGVVLFIGHVVNPLR               | 379-396 | 51.80% |
|     |                                    | HLGLQLPFSDEADLSEMVDSPMPQGLR      | 301-327 | 51.80% |
|     |                                    | ISFGIEASDLLK                     | 289-300 | 51.80% |
|     |                                    | ISSVFHK                          | 328-334 | 51.80% |
|     |                                    | LHALAEQVVQFVLADASYADSPR          | 76-98   | 51.80% |
|     |                                    | LSAPELLER                        | 261-270 | 51.80% |
|     |                                    | LSIAHQTR                         | 11-18   | 51.80% |
|     |                                    | LVLGNALYFK                       | 172-181 | 51.80% |
|     |                                    | TFVEVNETGTEAAAATAIK              | 335-353 | 51.80% |
|     |                                    | VTTGLIK                          | 152-158 | 51.80% |
|     |                                    | VTTGLIKDILPAGSISNTTR             | 152-171 | 51.80% |
|     |                                    | YKAEQSVDFQTK                     | 125-137 | 51.80% |
|     |                                    | AETQSVDFQTK                      | 127-137 | 56.00% |
|     |                                    | CLGLQLPFGDEADFSEMVDSLMPQGLR      | 301-327 | 56.00% |
|     |                                    | DQLVATLGTGK                      | 62-72   | 56.00% |
|     |                                    | EDISGVVLFMGMHVVNPLLSS            | 379-398 | 56.00% |
|     |                                    | IKDILPPGSIDNTTK                  | 157-171 | 56.00% |
|     |                                    | ISFGIEASDLLK                     | 289-300 | 56.00% |
|     |                                    | LASTISSNPK                       | 23-32   | 56.00% |
|     |                                    | LSAEPDFLER                       | 261-270 | 56.00% |
|     |                                    | LSIAHQTR                         | 11-18   | 56.00% |
|     |                                    | LVLANALYFK                       | 172-181 | 56.00% |
|     |                                    | NDYFYLLDGSSVQTPFMSSMDDQYLLSSDGLK | 195-226 | 56.00% |
|     |                                    | SAASNAAFSPVSLYSALSLLAAGAGSATR    | 33-61   | 56.00% |
|     |                                    | VSSVFHQAFVEVNEQGTEAAATAIK        | 328-353 | 56.00% |
|     |                                    | YKAETQSVDFQTK                    | 125-137 | 56.00% |

|     |                                                              |                                |         |        |
|-----|--------------------------------------------------------------|--------------------------------|---------|--------|
| TN1 | Fructose-1,6-bisphosphate aldolase 12<br>[Triticum aestivum] | AGNVLPGIKVDK                   | 95-106  | 63.40% |
|     |                                                              | ALNDQHVLLLEGTLKPNMVTGSDSK      | 211-236 | 63.40% |
|     |                                                              | ALNDQHVLLLEGTLKPNMVTGSDSKK     | 211-237 | 63.40% |
|     |                                                              | ALQQSTLK                       | 299-306 | 63.40% |
|     |                                                              | ANSEATLGTYK                    | 328-338 | 63.40% |
|     |                                                              | FASINVENVEDNRR                 | 40-53   | 63.40% |
|     |                                                              | GGKPFVDILK                     | 85-94   | 63.40% |
|     |                                                              | GILAADESTGTIGK                 | 25-38   | 63.40% |
|     |                                                              | GILAADESTGTIGKR                | 25-39   | 63.40% |
|     |                                                              | GTIELAGTNGETTTQGFDDL GK        | 107-128 | 63.40% |
|     |                                                              | GTIELAGTNGETTTQGFDDL GKR       | 107-129 | 63.40% |
|     |                                                              | IGATEPSQLSIDQNAQGLAR           | 149-168 | 63.40% |
|     |                                                              | KVAPEVIAEYTVR                  | 237-249 | 63.40% |
|     |                                                              | NAAYIGTPGK                     | 15-24   | 63.40% |
|     |                                                              | TVPAAVPAIVFLSGGQSEEEATLNLNAMNK | 254-283 | 63.40% |
|     |                                                              | VAPEVIAEYTVR                   | 238-249 | 63.40% |
|     |                                                              | VDKGTIELAGTNGETTTQGFDDL GK     | 104-128 | 63.40% |
|     |                                                              | VDKGTIELAGTNGETTTQGFDDL GKR    | 104-129 | 63.40% |
|     |                                                              | YAIICQENGLVPIVEPEILVDGPHDIDR   | 169-196 | 63.40% |
|     |                                                              | YKDELIK                        | 8-14    | 63.40% |
| TN2 | Tritin<br>[Triticum aestivum]                                | ADNLYWEGFK                     | 79-88   | 56.70% |
|     |                                                              | AQVNGWQDLSEALLK                | 202-216 | 56.70% |
|     |                                                              | DLLGDTDKLTNVALGR               | 116-131 | 56.70% |
|     |                                                              | EAVTTLMLMVHEATR                | 160-174 | 56.70% |
|     |                                                              | FQTVSGFVAGVLHPK                | 175-189 | 56.70% |
|     |                                                              | LRNPGHSSHNRVLPPIEPNVPPSR       | 34-58   | 56.70% |
|     |                                                              | LTNVALGR                       | 124-131 | 56.70% |
|     |                                                              | NPGHSSHNRVLPPIEPNVPPSR         | 36-58   | 56.70% |
|     |                                                              | PVLPIEPNVPPSR                  | 45-58   | 56.70% |
|     |                                                              | QQMADAVTALYGR                  | 132-144 | 56.70% |
|     |                                                              | SSDGTWWELTPGLIPGATHVGFGGTYR    | 89-115  | 56.70% |
|     |                                                              | TSPASTGLTLATR                  | 66-78   | 56.70% |
|     |                                                              | WFHIVLK                        | 59-65   | 56.70% |
|     | Serpin                                                       | EDISGVVLFMGHVVNPLLSS           | 379-398 | 40.50% |

|     |                                     |                                  |          |        |
|-----|-------------------------------------|----------------------------------|----------|--------|
| TN2 | [Triticum aestivum]                 | IKDILPSGSVDNTTK                  | 157-171  | 40.50% |
|     |                                     | ISFETEASDLLK                     | 289-300  | 40.50% |
|     |                                     | LSAEPDFLER                       | 261-270  | 40.50% |
|     |                                     | LSIAHQTR                         | 11-18    | 40.50% |
|     |                                     | LVLANALYFK                       | 172-181  | 40.50% |
|     |                                     | NDYFYLPDGSSVQTPFMSSMDDQYLSSSDGLK | 195-226  | 40.50% |
|     |                                     | QFSMYILLPEAPGGLSNLAEK            | 240-260  | 40.50% |
|     |                                     | VLKLPYK                          | 227-233  | 40.50% |
|     |                                     | VSSVFHQAFVEVNEQGTEAAASTAIK       | 328-353  | 40.50% |
|     |                                     | AAEVTTQVNSWVEK                   | 138-151  | 54.50% |
|     |                                     | AETQSVDFQTK                      | 127-137  | 54.50% |
|     |                                     | EDISGVVLFMGHVVNPLLSS             | 379-398  | 54.50% |
|     |                                     | IKDILPPGSIDNTTK                  | 157-171  | 54.50% |
|     |                                     | ISFGIEASDLLK                     | 289-300  | 54.50% |
|     |                                     | LSAEPDFLER                       | 261-270  | 54.50% |
|     |                                     | LSIAHQTR                         | 11-18    | 54.50% |
|     |                                     | LVLANALYFK                       | 172-181  | 54.50% |
|     |                                     | NDYFYLLDGSSVQTPFMSSMDDQYLLSSDGLK | 195-226  | 54.50% |
|     |                                     | QFFMYILLPEAPGGLSSLAEK            | 240-260  | 54.50% |
|     |                                     | SAASNAAFSPVSLYSALSLLAAGAGSATR    | 33-61    | 54.50% |
|     |                                     | VLKLPYK                          | 227-233  | 54.50% |
|     |                                     | VSSVFHQAFVEVNEQGTEAAASTAIK       | 328-353  | 54.50% |
|     |                                     | YKAETQSVDFQTK                    | 125-137  | 54.50% |
| TN2 | Peroxidase 1<br>[Triticum aestivum] | AVNDIRDLER                       | 113-123- | 50.80% |
|     |                                     | DFFEQFGVSMGK                     | 298309   | 50.80% |
|     |                                     | DIGLAAGLLR                       | 62-71    | 50.80% |
|     |                                     | DSVVVSGGPDYR                     | 142-153  | 50.80% |
|     |                                     | DSVVVSGGPDYRVPLGR                | 142-158  | 50.80% |
|     |                                     | EGLFVSDQDLFTNDITR                | 270-286  | 50.80% |
|     |                                     | EGLFVSDQDLFTNDITRPIVER           | 270-291  | 50.80% |
|     |                                     | GFVQDAVR                         | 53-60    | 50.80% |
|     |                                     | GFVQDAVRK                        | 53-61    | 50.80% |
| TN2 | Peroxidase 1<br>[Triticum aestivum] | GLSFDFYR                         | 34-41    | 50.80% |
|     |                                     | GLSFDFYRR                        | 34-42    | 50.80% |

|     |                                           |                                  |         |        |
|-----|-------------------------------------------|----------------------------------|---------|--------|
|     |                                           | KDIGLAAGLLR                      | 61-71   | 50.80% |
|     |                                           | LFPRPDPTINPPFLAR                 | 219-234 | 50.80% |
|     |                                           | PDPTINPPFLAR                     | 223-234 | 50.80% |
|     |                                           | PLGLDATDLVTISGGHTIGQAHCSSFEDR    | 190-218 | 50.80% |
|     |                                           | QDVLSDLPAPSSNVPSLLALLR           | 168-189 | 50.80% |
|     |                                           | TPNVFDNQYYVDLVNR                 | 254-269 | 50.80% |
|     |                                           | TSDLGEVR                         | 317-234 | 50.80% |
|     |                                           | TSDLGEVRR                        | 317-235 | 50.80% |
| TN3 | Class II chitinase<br>[Triticum aestivum] | AIGVDLLSNPDLVATDPTVSFK           | 154-175 | 99.70% |
|     |                                           | GAASDYCTPSAQWPCAPGK              | 114-132 | 99.70% |
|     |                                           | GFYTYDAFVAAAAAFPGFGTTGSADAQK     | 50-77   | 99.70% |
|     |                                           | GFYTYDAFVAAAAAFPGFGTTGSADAQKR    | 50-78   | 99.70% |
|     |                                           | GPIQLSHNINYGPAGR                 | 138-153 | 99.70% |
|     |                                           | GSVSSVVSRR                       | 23-31   | 99.70% |
|     |                                           | PSSHAVITGQWSPSGADR               | 189-206 | 99.70% |
|     |                                           | RYCDILGVGYGDNLDCYNQRPFA          | 244-266 | 99.70% |
|     |                                           | VPFGFVITNIINGGIECGHGQDSR         | 211-234 | 99.70% |
|     |                                           | YCDILGVGYGDNLDCYNQR              | 245-263 | 99.70% |
|     |                                           | YCDILGVGYGDNLDCYNQRPFA           | 245-266 | 99.70% |
| TN4 | Serpina<br>[Triticum aestivum]            | EDISGVVLFMGHVVNPLLSS             | 379-398 | 38.70% |
|     |                                           | IKDILPSGSVDNNTK                  | 157-171 | 38.70% |
|     |                                           | ISFETEASDLLK                     | 289-300 | 38.70% |
|     |                                           | LSAEPDFLER                       | 261-270 | 38.70% |
|     |                                           | LSIAHQTR                         | 11-18   | 38.70% |
|     |                                           | LVLANALYFK                       | 172-181 | 38.70% |
|     |                                           | NDYFYLPDGSSVQTPFMSSMDDQYLSSSDGLK | 195-226 | 38.70% |
|     |                                           | QFSMYILLPEAPGGLSNLAEK            | 240-260 | 38.70% |
|     |                                           | VSSVFHQAFVEVNEQGTEAAASTAIK       | 328-353 | 38.70% |
|     |                                           | DQLVATLGTGK                      | 62-72   | 52.00% |
|     |                                           | EDISGVVLFMGHVVNPLLSS             | 379-398 | 52.00% |
|     |                                           | IKDILPPGSIDNNTK                  | 157-171 | 52.00% |
| TN4 | Serpina<br>[Triticum aestivum]            | ISFGIEASDLLK                     | 289-300 | 52.00% |
|     |                                           | LSAEPDFLER                       | 261-270 | 52.00% |
|     |                                           | LSIAHQTR                         | 11-18   | 52.00% |

|     |                                                   |                                  |         |        |
|-----|---------------------------------------------------|----------------------------------|---------|--------|
|     |                                                   | LVLANALYFK                       | 172-181 | 52.00% |
|     |                                                   | NDYFYLLDGSSVQTPFMSSMDDQYLLSSDGLK | 195-226 | 52.00% |
|     |                                                   | QFFMYILLPEAPGGLSSLAEK            | 240-260 | 52.00% |
|     |                                                   | SAASNAAFSPVSLYSALSLLAAGAGSATR    | 33-61   | 52.00% |
|     |                                                   | VSSVFHQAFVEVNEQGTEAAASTAIK       | 328-353 | 52.00% |
|     |                                                   | YKAETQSVDFQTK                    | 125-137 | 52.00% |
| TN4 | Dehydroascorbate reductase<br>[Triticum aestivum] | AAVGHPDTLGDCPFSQR                | 8-24    | 86.30% |
|     |                                                   | AHGPYINGANISAVDLSLAPK            | 136-156 | 86.30% |
|     |                                                   | ALVDELQALEEHLK                   | 122-135 | 86.30% |
|     |                                                   | ENLIAGWAPK                       | 200-209 | 86.30% |
|     |                                                   | IFSTFVTLK                        | 102-111 | 86.30% |
|     |                                                   | KVPYQMK                          | 33-39   | 86.30% |
|     |                                                   | LIDVSNKPDWFLK                    | 40-52   | 86.30% |
|     |                                                   | LYHLQVALEHFK                     | 157-168 | 86.30% |
|     |                                                   | SKDASDGSEK                       | 112-121 | 86.30% |
|     |                                                   | VLLTLEEK                         | 25-32   | 86.30% |
|     |                                                   | VPETLTSVHAYTEALFSR               | 172-189 | 86.30% |
|     |                                                   | VPVYNGGDGK                       | 59-68   | 86.30% |
|     |                                                   | WIADSDVITQVIEEK                  | 69-83   | 86.30% |
|     |                                                   | YPTPSLVTPAEYASVGSK               | 84-101  | 86.30% |
| TN4 | Endogenous alpha-amylase/subtilisin inhibitor     | ADANYVLPANR                      | 15-26   | 80.60% |
|     |                                                   | AHGGGLTMAPGHGR                   | 27-40   | 80.60% |
|     |                                                   | AHGGGLTMAPGHGRR                  | 27-41   | 80.60% |
|     |                                                   | AYTTCVQSTEWIHIDSELVSGR           | 85-105  | 80.60% |
|     |                                                   | CPLFVSQEADGQR                    | 42-54   | 80.60% |
|     |                                                   | DPPPVHDTDGNELR                   | 1-14    | 80.60% |
|     |                                                   | DPPPVHDTDGNELRADANYVLPANR        | 1-26    | 80.60% |
|     |                                                   | GGAWFLGATEPYHVVVFK               | 158-175 | 80.60% |
|     |                                                   | HVITGPVR                         | 107-114 | 80.60% |
|     |                                                   | HVITGPVRDPSPSGR                  | 107-121 | 80.60% |
| TN4 | Endogenous alpha-amylase/subtilisin inhibitor     | IAPHGGAPSDK                      | 61-71   | 80.60% |
|     |                                                   | LMACGDSCQDLGVFR                  | 140-154 | 80.60% |
|     |                                                   | RCPLFVSQEADGQR                   | 41-54   | 80.60% |
|     |                                                   | RHVITGPVRDPSPSGR                 | 106-121 | 80.60% |

|     |                                                              |                              |         |        |
|-----|--------------------------------------------------------------|------------------------------|---------|--------|
|     |                                                              | YSGAEVHEYK                   | 130-139 | 80.60% |
| TN4 | Glyceraldehyde-3-phosphate dehydrogenase [Triticum aestivum] | AAIKEESEGNLK                 | 262-273 | 49.20% |
|     |                                                              | AASFNIIPSSTGAAK              | 203-217 | 49.20% |
|     |                                                              | DAPMFVCGVNEK                 | 129-140 | 49.20% |
|     |                                                              | DAPMFVCGVNEKEYK              | 129-143 | 49.20% |
|     |                                                              | FGIVEGLMTTVHAMTATQK          | 170-188 | 49.20% |
|     |                                                              | GILGYVDEDLVSTDFQGDNR         | 274-293 | 49.20% |
|     |                                                              | IGINGFGR                     | 6-13    | 49.20% |
|     |                                                              | KVIISAPSK                    | 120-128 | 49.20% |
|     |                                                              | SDIDIVSNASCTTNCLAPLAK        | 144-164 | 49.20% |
|     |                                                              | SSIFDAK                      | 294-300 | 49.20% |
|     |                                                              | VALQSPDVELVAVNDPFITTDYMTYMFK | 21-48   | 49.20% |
|     |                                                              | VLPELNGK                     | 222-229 | 49.20% |
|     |                                                              | VPTVDVSVVDLTVR               | 237-250 | 49.20% |
|     |                                                              | AASFNIIPSSTGAAK              | 202-216 | 47.80% |
|     |                                                              | AASYDDIKK                    | 253-261 | 47.80% |
|     |                                                              | AGIALNDHFVK                  | 300-310 | 47.80% |
|     |                                                              | DAPMFVVGVNEDK                | 128-140 | 47.80% |
|     |                                                              | GIMGYVEEDLVSTDFVGDSR         | 273-292 | 47.80% |
|     |                                                              | IGINGFGR                     | 5-12    | 47.80% |
|     |                                                              | IINDNFGIIEGLMTTVHAITATQK     | 164-187 | 47.80% |
|     |                                                              | KVVISAPSK                    | 119-127 | 47.80% |
|     |                                                              | LTGMSFR                      | 229-235 | 47.80% |
|     |                                                              | SSIFDAK                      | 293-299 | 47.80% |
|     |                                                              | TLLFGEKPVTVFGVR              | 67-81   | 47.80% |
|     |                                                              | VLPELNGK                     | 221-228 | 47.80% |
|     |                                                              | VPTVDVSVVDLTVR               | 236-249 | 47.80% |

|     |                                               |                 |       |        |
|-----|-----------------------------------------------|-----------------|-------|--------|
| TN5 | Endogenous alpha-amylase/subtilisin inhibitor | AHGGGLTMAPGHGR  | 27-40 | 69.40% |
|     |                                               | AHGGGLTMAPGHGRR | 27-41 | 69.40% |
|     |                                               | CPLFVSQEADGQR   | 42-54 | 69.40% |
|     |                                               | DPPPVHDTDGNELR  | 1-14  | 69.40% |

|     |                                    |                                |         |        |
|-----|------------------------------------|--------------------------------|---------|--------|
|     |                                    | DPPPVHDTDGNELRADANYVLPANR      | 1-26    | 69.40% |
|     |                                    | GGAWFLGATEPYHVVFVK             | 158-175 | 69.40% |
|     |                                    | GGAWFLGATEPYHVVFVK             | 158-176 | 69.40% |
|     |                                    | HVITGPVR                       | 107-114 | 69.40% |
|     |                                    | HVITGPVRDPSPSGR                | 107-121 | 69.40% |
|     |                                    | IAPHGGAPSDK                    | 61-71   | 69.40% |
|     |                                    | LMACGDSCQDLGVFR                | 140-154 | 69.40% |
|     |                                    | RCPLFVSQEADGQR                 | 41-54   | 69.40% |
|     |                                    | RHVITGPVRDPSPSGR               | 106-121 | 69.40% |
|     |                                    | YSGAEVHEYK                     | 130-139 | 69.40% |
| TN5 | Globulin-3A<br>[Triticum aestivum] | AFVVPGLTDADGVGYVAQGEGLTVIENGEK | 182-212 | 41.30% |
|     |                                    | AKDQQDEGFVAGPEQQQEHER          | 542-562 | 41.30% |
|     |                                    | AKDQQDEGFVAGPEQQQEHERGDR       | 542-565 | 41.30% |
|     |                                    | ALRPFDEVSR                     | 154-163 | 41.30% |
|     |                                    | ASEEQLR                        | 307-313 | 41.30% |
|     |                                    | DQQDEGFVAGPEQQQEHER            | 544-562 | 41.30% |
|     |                                    | DTFNLEQRPK                     | 339-349 | 41.30% |
|     |                                    | EVQEVFR                        | 535-541 | 41.30% |
|     |                                    | FQYFSAK                        | 257-263 | 41.30% |
|     |                                    | FQYFSAKPLLASLSK                | 257-271 | 41.30% |
|     |                                    | GSAFVVPGHPVVEIASSR             | 470-488 | 41.30% |
|     |                                    | GSGSESEEEQDQQR                 | 446-459 | 41.30% |
|     |                                    | GSGSESEEEQDQQRVETVR            | 446-464 | 41.30% |
|     |                                    | GSSNLQVVCFEINAER               | 489-504 | 41.30% |
|     |                                    | ILHTISVPGK                     | 247-256 | 41.30% |
|     |                                    | LDDPAQELAFGR                   | 520-531 | 41.30% |
|     |                                    | LDDPAQELAFGRPAR                | 520-534 | 41.30% |
|     |                                    | PLLASLSK                       | 264-271 | 41.30% |
| TN5 | Globulin-3A<br>[Triticum aestivum] | QGDVIVAPAGSIMHLANTDGR          | 219-239 | 41.30% |
|     |                                    | QGDVIVAPAGSIMHLANTDGR          | 219-240 | 41.30% |
|     |                                    | RSGSESEEEQDQQRVETVR            | 445-464 | 41.30% |
|     |                                    | RPYVFGPR                       | 132-139 | 41.30% |
|     |                                    | RVLTAALK                       | 272-279 | 41.30% |
|     |                                    | SFHALAQHDVR                    | 364-374 | 41.30% |



|     |                                                |                                 |         |        |
|-----|------------------------------------------------|---------------------------------|---------|--------|
|     |                                                | VAIMEVNPR                       | 173-181 | 41.30% |
|     |                                                | VLTAALK                         | 273-279 | 41.30% |
| TN6 | Globulin-3A<br>[Triticum aestivum]             | AFVVPGLTDADGVGYVAQGEGLTVIENG EK | 182-212 | 40.80% |
|     |                                                | AKDQQDEGFVAGPEQQQEHER           | 542-562 | 40.80% |
|     |                                                | AKDQQDEGFVAGPEQQQEHERGDR        | 542-565 | 40.80% |
|     |                                                | ALRPFDEVSR                      | 154-163 | 40.80% |
|     |                                                | ASEEQLR                         | 307-313 | 40.80% |
|     |                                                | DQQDEGFVAGPEQQQEHER             | 544-562 | 40.80% |
|     |                                                | DQQDEGFVAGPEQQQEHERGDR          | 544-565 | 40.80% |
|     |                                                | DTFNLLEQR                       | 339-347 | 40.80% |
|     |                                                | DTFNLLEQRPK                     | 339-349 | 40.80% |
|     |                                                | EVQEVFR                         | 535-541 | 40.80% |
|     |                                                | GRGDEAVEAFLR                    | 571-582 | 40.80% |
|     |                                                | GSAFVPPGHPVVEIASSR              | 470-488 | 40.80% |
|     |                                                | GSGSESEEEQDQQR                  | 446-459 | 40.80% |
|     |                                                | GSGSESEEEQDQQR YETVR            | 446-464 | 40.80% |
|     |                                                | GSSNLQVVCFEINAER                | 489-504 | 40.80% |
|     |                                                | GSSNLQVVCFEINAERNER             | 489-507 | 40.80% |
|     |                                                | ILHTISVPGK                      | 247-256 | 40.80% |
|     |                                                | LDDPAQELAFGR                    | 520-531 | 40.80% |
|     |                                                | LDDPAQELAFGRPAR                 | 520-534 | 40.80% |
|     |                                                | LGSLGSR                         | 285-292 | 40.80% |
|     |                                                | LYEADAR                         | 357-363 | 40.80% |
|     |                                                | QGDVIVAPAGSIMHLANTDGR           | 219-239 | 40.80% |
|     |                                                | RSGSESEEEQDQQR                  | 445-459 | 40.80% |
|     |                                                | RSGSESEEEQDQQR YETVR            | 445-464 | 40.80% |
|     |                                                | RPYVFGPR                        | 132-139 | 40.80% |
| TN6 | Globulin-3A<br>[Triticum aestivum]             | SFHALAQH DVR                    | 364-374 | 40.80% |
| TN6 | Heat shock protein 17.3<br>[Triticum aestivum] | AMAATPADVK                      | 48-57   | 47.80% |
|     |                                                | DGVLTVTVDK                      | 134-143 | 47.80% |
|     |                                                | DGVLTVTVDKLPPEPK                | 134-150 | 47.80% |
|     |                                                | ELPGAYAFVVDMPGLGSGDIK           | 58-78   | 47.80% |
|     |                                                | FVLPENADMEK                     | 117-127 | 47.80% |

|     |                                                     |                                       |         |        |
|-----|-----------------------------------------------------|---------------------------------------|---------|--------|
|     |                                                     | KFVLPENADMEK                          | 116-127 | 47.80% |
|     |                                                     | LPPPEPK                               | 144-150 | 47.80% |
|     |                                                     | VLVISGER                              | 86-93   | 47.80% |
|     |                                                     | VQVEDER                               | 79-85   | 47.80% |
| TN6 | Alpha amylase inhibitor protein [Triticum aestivum] | DYVLQQTCTGFTPGSK                      | 45-60   | 69.00% |
|     |                                                     | EMQWDFVR                              | 133-140 | 69.00% |
|     |                                                     | LLVAPGQC�LATIHNVRLPEWMTSASIYSPGKPYLAK | 141-157 | 69.00% |
|     |                                                     |                                       | 61-80   | 69.00% |
|     |                                                     | LYCCQELAEISQQCR                       | 81-95   | 69.00% |
|     |                                                     | SGNVGESGLIDLPGCPR                     | 116-132 | 69.00% |
|     |                                                     | TNLLPHCR                              | 37-44   | 69.00% |
|     |                                                     | YFIALPVPSQPVDPR                       | 101-115 | 69.00% |
| TN7 | Histone H4 [Triticum aestivum]                      | DAVTYTEHAR                            | 69-78   | 59.20% |
|     |                                                     | DNIQGITK                              | 25-32   | 59.20% |
|     |                                                     | DNIQGITKPAIR                          | 25-36   | 59.20% |
|     |                                                     | ISGLIYEETR                            | 47-56   | 59.20% |
|     |                                                     | ISGLIYEETRGLK                         | 47-60   | 59.20% |
|     |                                                     | KTVTAMDVVYALK                         | 80-92   | 59.20% |
|     |                                                     | KTVTAMDVVYALKR                        | 80-93   | 59.20% |
|     |                                                     | RISGLIYEETR                           | 46-56   | 59.20% |
|     |                                                     | TLYGFGG                               | 97-103  | 59.20% |
|     |                                                     | TVTAMDVVYALK                          | 81-92   | 59.20% |
|     |                                                     | TVTAMDVVYALKR                         | 81-93   | 59.20% |
|     |                                                     | VLRDNIQGITKPAIR                       | 22-36   | 59.20% |

|     |                                                              |                          |         |        |
|-----|--------------------------------------------------------------|--------------------------|---------|--------|
| TN7 | Glyceraldehyde-3-phosphate dehydrogenase [Triticum aestivum] | AASYDDIK                 | 253-260 | 55.50% |
|     |                                                              | AASYDDIKK                | 253-261 | 55.50% |
|     |                                                              | AGIALNDHFVK              | 300-310 | 55.50% |
|     |                                                              | GIMGYVEEDLVSTDFVGDSR     | 273-292 | 55.50% |
|     |                                                              | IINDNFGIIEGLMTTVHAITATQK | 164-187 | 55.50% |
|     |                                                              | KVVISAPSK                | 119-127 | 55.50% |
|     |                                                              | LTGMSFR                  | 229-235 | 55.50% |

|  |  |                              |         |        |
|--|--|------------------------------|---------|--------|
|  |  | NPEEIPWGEAGADYVVESTGVFTDKDK  | 82-108  | 55.50% |
|  |  | SSIFDAK                      | 293-299 | 55.50% |
|  |  | TLLFGEK                      | 67-73   | 55.50% |
|  |  | TLLFGEKPVTVFGVR              | 67-81   | 55.50% |
|  |  | VALQSDDVELVAVNDPFITTEYMTYMFK | 20-47   | 55.50% |
|  |  | VPTVDVSVVDLTVR               | 236-249 | 55.50% |
|  |  | AAIKEESEGNLK                 | 262-27  | 57.80% |
|  |  | AASFNIIPSSTGAAK              | 203-217 | 57.80% |
|  |  | AGIALNDNFVK                  | 301-311 | 57.80% |
|  |  | DAPMFVCGVNEK                 | 129-140 | 57.80% |
|  |  | EVAVFGCR                     | 75-82   | 57.80% |
|  |  | FGIVEGLMTTVHAMTATQK          | 170-188 | 57.80% |
|  |  | GILGYVDEDLVSTDFQGDNR         | 274-293 | 57.80% |
|  |  | KVIISAPSK                    | 120-128 | 57.80% |
|  |  | LAKPATYDQIK                  | 251-261 | 57.80% |
|  |  | LTGMAFR                      | 230-236 | 57.80% |
|  |  | NPEEIPWAAAGAEYVVESTGVFTDKDK  | 83-109  | 57.80% |
|  |  | PATYDQIK                     | 254-261 | 57.80% |
|  |  | SSIFDAK                      | 294-300 | 57.80% |
|  |  | TLLFGEK                      | 68-74   | 57.80% |
|  |  | VALQSPDVELVAVNDPFITTDYMTYMFK | 21-48   | 57.80% |
|  |  | VIISAPSK                     | 121-128 | 57.80% |
|  |  | VPTVDVSVVDLTVR               | 237-250 | 57.80% |
