# Supplementary material for: A Mouse-Based Method to Monitor Wheat Allergens in Novel Wheat Lines and Varieties Created by Crossbreeding: Proof-of-Concept Using Durum and A. tauschii Wheats
Source: MDPI journal article supplement (doi:10.3390/ijms23126505), 2022-06-10
Supplement: s1 [file s1]

**Table S3.** Peptides sequences, positions, and coverage for wheat allergens identified in boiled/reduced tauschii wheat.

| <b>IgE-binding band</b> | <b>Protein</b>                 | <b>Sequence</b>                       | <b>Position</b> | <b>Percent coverage</b> |
|-------------------------|--------------------------------|---------------------------------------|-----------------|-------------------------|
| DB1                     | Serin 3<br>[Triticum aestivum] | AAEVTTQVNSWVEK                        | 138-151         | 91.70%                  |
|                         |                                | AAFSPVSLHSALSLLAAGAGSATR              | 38-61           | 91.70%                  |
|                         |                                | AETQSVDFQTK                           | 127-137         | 91.70%                  |
|                         |                                | AFSPVSLHSALSLLAAGAGSATR               | 39-61           | 91.70%                  |
|                         |                                | AFVEVNEQGTEAAASTAIK                   | 336-354         | 91.70%                  |
|                         |                                | ASNAAFSPVSLHSALSLLAAGAGSATR           | 35-61           | 91.70%                  |
|                         |                                | ATTLATDVR                             | 2-10            | 91.70%                  |
|                         |                                | AWTDQFDSYGTK                          | 183-194         | 91.70%                  |
|                         |                                | CLGLQLPFSDEADFSEMVDSPMPQGLR           | 302-328         | 91.70%                  |
|                         |                                | DDQYISSDGLK                           | 216-227         | 91.70%                  |
|                         |                                | DQLVATLGTGEVEGLHALAEQVVQF             | 62-86           | 91.70%                  |
|                         |                                | DQLVATLGTGEVEGLHALAEQVVQFVLADASSAGGPR | 62-98           | 91.70%                  |
|                         |                                | EDISGVVLF                             | 380-388         | 91.70%                  |
|                         |                                | EDISGVVLFMGHVVN                       | 380-394         | 91.70%                  |
|                         |                                | EDISGVVLFMGHVVNPL                     | 380-396         | 91.70%                  |
|                         |                                | EPDFLER                               | 265-271         | 91.70%                  |
|                         |                                | EVTQVNSWVEK                           | 140-151         | 91.70%                  |
|                         |                                | FGIEASDLLK                            | 292-301         | 91.70%                  |
|                         |                                | FSPVSLHSALSLLAAGAGSATR                | 40-61           | 91.70%                  |
|                         |                                | FVLADASSAGGPR                         | 86-98           | 91.70%                  |
|                         |                                | GAWTDQFD                              | 182-189         | 91.70%                  |
|                         |                                | GAWTDQFDSYGTK                         | 182-194         | 91.70%                  |
|                         |                                | HSALSLLAAGAGSATR                      | 46-61           | 91.70%                  |
|                         |                                | IKNILPSGSVDN                          | 157-168         | 91.70%                  |
|                         |                                | IKNILPSGSVDNTTK                       | 157-171         | 91.70%                  |
|                         |                                | IKNILPSGSVDNTTKLVLANALYFK             | 157-181         | 91.70%                  |
|                         |                                | ILLPEAPGGLSSLAEK                      | 246-261         | 91.70%                  |
|                         |                                | ILPSGSVDNTTK                          | 160-171         | 91.70%                  |
|                         |                                | ISFGIEASDLLK                          | 290-301         | 91.70%                  |
|                         |                                | KAETQSVDFQTK                          | 126-137         | 91.70%                  |

|     |                               |                                   |         |        |
|-----|-------------------------------|-----------------------------------|---------|--------|
| DB1 | Serp13<br>[Triticum aestivum] | LANALYFK                          | 174-181 | 91.70% |
|     |                               | LASTISSNPK                        | 23-32   | 91.70% |
|     |                               | LKPSFQELAVCK                      | 113-124 | 91.70% |
|     |                               | LPEAPGGLSSLAEK                    | 248-261 | 91.70% |
|     |                               | LSAEPDFLER                        | 262-271 | 91.70% |
|     |                               | LSAEPDFLERHIPR                    | 262-275 | 91.70% |
|     |                               | LSIAHQTR                          | 11-18   | 91.70% |
|     |                               | LSLLAAGAGSATR                     | 49-61   | 91.70% |
|     |                               | LVLANAL                           | 172-178 | 91.70% |
|     |                               | LVLANALYFK                        | 172-181 | 91.70% |
|     |                               | MSSMDDDQYISSSDGLK                 | 211-227 | 91.70% |
|     |                               | MVPQQARPPSVMDFIADHPFLFLR          | 355-379 | 91.70% |
|     |                               | NAAFSPVSLHSALSLLAAGAGSATR         | 37-61   | 91.70% |
|     |                               | NDYFYLLDGSSVQTPF                  | 195-178 | 91.70% |
|     |                               | NDYFYLLDGSSVQTPFMSSMDD            | 195-181 | 91.70% |
|     |                               | NDYFYLLDGSSVQTPFMSSMDDDQYISSSDGLK | 195-227 | 91.70% |
|     |                               | NILPSGSVDNTTK                     | 159-171 | 91.70% |
|     |                               | PEAPGGLSSLAEK                     | 249-261 | 91.70% |
|     |                               | PGGLSSLAEK                        | 252-261 | 91.70% |
|     |                               | PPSVMDFIADHPFLFLR                 | 362-379 | 91.70% |
|     |                               | PQQARPPSVMDFIADHPFLFLR            | 357-379 | 91.70% |
|     |                               | PSFQELAVCK                        | 115-124 | 91.70% |
|     |                               | PSGSVDNTTK                        | 162-171 | 91.70% |
|     |                               | QARPPSVMDFIADHPFLFLR              | 359-379 | 91.70% |
|     |                               | QFSMYILLPEAPGGLSSLA               | 241-259 | 91.70% |
|     |                               | QFSMYILLPEAPGGLSSLAEK             | 241-261 | 91.70% |
|     |                               | QSVDFQTK                          | 130-137 | 91.70% |
|     |                               | QYISSSDGLK                        | 218-227 | 91.70% |
|     |                               | SAASNAAFSPVSLH                    | 33-46   | 91.70% |
|     |                               | SAASNAAFSPVSLHS                   | 33-47   | 91.70% |
|     |                               | SAASNAAFSPVSLHSA                  | 33-48   | 91.70% |
|     |                               | SAASNAAFSPVSLHSAL                 | 33-49   | 91.70% |
|     |                               | SAASNAAFSPVSLHSALSLLAAGAGSA       | 33-59   | 91.70% |
|     |                               | SAASNAAFSPVSLHSALSLLAAGAGSATR     | 33-61   | 91.70% |

|     |                                     |                                     |         |        |
|-----|-------------------------------------|-------------------------------------|---------|--------|
|     |                                     | SAEPDFLERHIPR                       | 263-275 | 91.70% |
| DB1 | Serpins 3<br>[Triticum aestivum]    | SALLSLLAAGAGSATR                    | 47-61   | 91.70% |
|     |                                     | SIAHQTR                             | 12-18   | 91.70% |
|     |                                     | SLLAAGAGSATR                        | 50-61   | 91.70% |
|     |                                     | SPVSLHSALLSLLAAGAGSATR              | 41-61   | 91.70% |
|     |                                     | TTLATDVR                            | 3-10    | 91.70% |
|     |                                     | VAFANGVFVDASLLK                     | 99-114  | 91.70% |
|     |                                     | VAFANGVFVDASLLKPSFQELAVCK           | 99-124  | 91.70% |
|     |                                     | VLADASSAGGPR                        | 87-98   | 91.70% |
|     |                                     | VLANALYFK                           | 173-181 | 91.70% |
|     |                                     | VLKLPYK                             | 228-234 | 91.70% |
|     |                                     | VSSVFHQAFVEVN                       | 329-341 | 91.70% |
|     |                                     | VSSVFHQAFVEVNEQ                     | 329-343 | 91.70% |
|     |                                     | VSSVFHQAFVEVNEQGTAAA                | 329-349 | 91.70% |
|     |                                     | VSSVFHQAFVEVNEQGTAAAST              | 329-351 | 91.70% |
|     |                                     | VSSVFHQAFVEVNEQGTAAASTAIK           | 329-354 | 91.70% |
|     |                                     | YILLPEAPGGLSSLAEK                   | 245-261 | 91.70% |
|     |                                     | YKAETQSVDFQTK                       | 125-137 | 91.70% |
|     |                                     | YKAETQSVDFQTKAAEVTTQVNSWVEK         | 125-151 | 91.70% |
| DB1 | Serpins-N3.2<br>[Triticum aestivum] | AAEVTAQVNSWVEK                      | 138-151 | 93.00% |
|     |                                     | AAEVTAQVNSWVEKVTGLIK                | 138-158 | 93.00% |
|     |                                     | AEAQSVDFQTK                         | 127-137 | 93.00% |
|     |                                     | AEAQSVDFQTKAAEVTAQVNSWVEK           | 127-151 | 93.00% |
|     |                                     | AEPEFLEQHIPR                        | 263-274 | 93.00% |
|     |                                     | AFVEVNETGTAAATTIAK                  | 335-353 | 93.00% |
|     |                                     | ALAEQVVQFVLADASNIGGPR               | 78-98   | 93.00% |
|     |                                     | ATQSDDFYLLD                         | 192-202 | 93.00% |
|     |                                     | ATQSDDFYLLDGSSIQTPTF                | 192-210 | 93.00% |
|     |                                     | ATQSDDFYLLDGSSIQTPTFMY              | 192-212 | 93.00% |
|     |                                     | ATQSDDFYLLDGSSIQTPTFMYSSEEQYISSDGLK | 192-226 | 93.00% |
|     |                                     | ATTLATDVR                           | 2-10    | 93.00% |
|     |                                     | DGSSIQTPTFMYSSEEQYISSDGLK           | 202-226 | 93.00% |
|     |                                     | DILPAGSIDNTTR                       | 159-171 | 93.00% |
|     |                                     | EAQSVDFQTK                          | 128-137 | 93.00% |

|     |                                    |                                         |         |        |
|-----|------------------------------------|-----------------------------------------|---------|--------|
| DB1 | Serpín-N3.2<br>[Triticum aestivum] | EDTSGVVLFIGH                            | 379-390 | 93.00% |
|     |                                    | EDTSGVVLFIGHVVN                         | 379-393 | 93.00% |
|     |                                    | EDTSGVVLFIGHVVNPL                       | 379-395 | 93.00% |
|     |                                    | EDTSGVVLFIGHVVNPLLS                     | 379-397 | 93.00% |
|     |                                    | EDTSGVVLFIGHVVNPLLS                     | 379-398 | 93.00% |
|     |                                    | EFLEQHPR                                | 266-274 | 93.00% |
|     |                                    | EPEFLEQHPR                              | 264-274 | 93.00% |
|     |                                    | EVTAQVNSWVEK                            | 140-151 | 93.00% |
|     |                                    | GAWTDQFD                                | 182-189 | 93.00% |
|     |                                    | GAWTDQFDPR                              | 182-191 | 93.00% |
|     |                                    | GHVVNPLLS                               | 389-398 | 93.00% |
|     |                                    | GLGLQLPF                                | 301-308 | 93.00% |
|     |                                    | GLGLQLPFGAEADLSEMVDSPMAQNLVISSIFHK      | 301-334 | 93.00% |
|     |                                    | HVALSLITAGAGGATR                        | 46-61   | 93.00% |
|     |                                    | IGHVVNPLLS                              | 388-398 | 93.00% |
|     |                                    | IKDILPAGSIDNTTR                         | 157-171 | 93.00% |
|     |                                    | ILLPEALSGLWSLAEK                        | 245-260 | 93.00% |
|     |                                    | ILPAGSIDNTTR                            | 160-171 | 93.00% |
|     |                                    | ISLGIEASDLLK                            | 289-300 | 93.00% |
|     |                                    | KAEAQSVDFQTK                            | 126-137 | 93.00% |
|     |                                    | LASAISSNPESTVN                          | 23-36   | 93.00% |
|     |                                    | LASAISSNPESTVNNAAFSPVSL                 | 23-45   | 93.00% |
|     |                                    | LASAISSNPESTVNNAAFSPVSLH                | 23-46   | 93.00% |
|     |                                    | LASAISSNPESTVNNAAFSPVSLHVAL             | 23-49   | 93.00% |
|     |                                    | LASAISSNPESTVNNAAFSPVSLHVALSLITAGAGGA   | 23-59   | 93.00% |
|     |                                    | LASAISSNPESTVNNAAFSPVSLHVALSLITAGAGGATR | 23-61   | 93.00% |
|     |                                    | LGNALYFK                                | 174-181 | 93.00% |
|     |                                    | LKPSFQELAVCK                            | 113-124 | 93.00% |
|     |                                    | LPAGSIDNTTR                             | 161-171 | 93.00% |
|     |                                    | LPEALSGLWSLAEK                          | 247-260 | 93.00% |
|     |                                    | LSAEPEFLEQHPR                           | 261-274 | 93.00% |
|     |                                    | LSIAHQTR                                | 11-18   | 93.00% |
|     |                                    | LSLITAGAGGATR                           | 49-61   | 93.00% |
|     | Serpín-N3.2                        | LVLGNALYFK                              | 172-181 | 93.00% |

|     |                                    |                                       |         |        |
|-----|------------------------------------|---------------------------------------|---------|--------|
| DB1 | [Triticum aestivum]                | LYISSIFHK                             | 326-334 | 93.00% |
|     |                                    | MYSSEEQYISSSDGLK                      | 211-226 | 93.00% |
|     |                                    | NAAFSPVSLHVALSLITAGAGGATR             | 37-61   | 93.00% |
|     |                                    | NLYISSIFHK                            | 325-334 | 93.00% |
|     |                                    | NQLAATLGEGEVEGLHALAEQVVQF             | 62-86   | 93.00% |
|     |                                    | NQLAATLGEGEVEGLHALAEQVVQFVLADASN      | 62-92   | 93.00% |
|     |                                    | NQLAATLGEGEVEGLHALAEQVVQFVLADASNIGGPR | 62-98   | 93.00% |
|     |                                    | PAGSIDNTTR                            | 162-171 | 93.00% |
|     |                                    | PEALSGLWSLAEK                         | 248-260 | 93.00% |
|     |                                    | PEFLEQHPR                             | 265-274 | 93.00% |
|     |                                    | PESTVNNAAFSPVSLHVALSLITAGAGGATR       | 31-61   | 93.00% |
|     |                                    | PPPSVLDFIVDHPFLIR                     | 360-378 | 93.00% |
|     |                                    | PSFQELAVCK                            | 115-124 | 93.00% |
|     |                                    | PSVLDFIVDHPFLIR                       | 362-378 | 93.00% |
|     |                                    | QAPPPSVLDFIVDHPF                      | 358-373 | 93.00% |
|     |                                    | QAPPPSVLDFIVDHPFLF                    | 358-375 | 93.00% |
|     |                                    | QAPPPSVLDFIVDHPFLIR                   | 358-378 | 93.00% |
|     |                                    | QFSMYILLPEALSGLWSLAEK                 | 240-260 | 93.00% |
|     |                                    | QLAATLGEGEVEGLHALAEQVVQFVLADASNIGGPR  | 63-98   | 93.00% |
|     |                                    | QLKPSFQELAVCK                         | 112-124 | 93.00% |
|     |                                    | QSVDFQTK                              | 130-137 | 93.00% |
|     |                                    | QYISSSDGLK                            | 217-226 | 93.00% |
|     |                                    | RQFSMYILLPEALSGLWSLAEK                | 239-260 | 93.00% |
|     |                                    | SAEPEFLEQHPR                          | 262-274 | 93.00% |
|     |                                    | SIAHQTR                               | 12-18   | 93.00% |
|     |                                    | SPMAQNLYISSIFHK                       | 320-334 | 93.00% |
|     |                                    | SSEEQYISSSDGLK                        | 213-226 | 93.00% |
|     |                                    | TLGEGEVEGLHALAEQVVQFVLADASNIGGPR      | 67-98   | 93.00% |
|     |                                    | TTLATDVR                              | 3-10    | 93.00% |
|     |                                    | VAFANGVFVDASLQLKPSFQELAVCK            | 99-124  | 93.00% |
|     |                                    | VALSLITAGAGGATR                       | 47-61   | 93.00% |
|     |                                    | VLADASNIGGPR                          | 87-98   | 93.00% |
| DB1 | Serpín-N3.2<br>[Triticum aestivum] | VLKLPYK                               | 227-233 | 93.00% |
|     |                                    | VTTGLIK                               | 152-158 | 93.00% |

|     |                                   |                                  |         |        |
|-----|-----------------------------------|----------------------------------|---------|--------|
|     |                                   | VTTGLIKDILPAGSIDNTTR             | 152-171 | 93.00% |
|     |                                   | VVNPLLSS                         | 391-398 | 93.00% |
|     |                                   | YILLPEALSGLWSLAEK                | 244-260 | 93.00% |
|     |                                   | YKAEAQSVDFQTK                    | 125-137 | 93.00% |
|     |                                   | YSSEEQYISSDGLK                   | 212-226 | 93.00% |
| DB1 | Globulin 3<br>[Triticum aestivum] | AFVVPGLTDADGVGYVAQGEGVLTVIENGEK  | 182-212 | 33.80% |
|     |                                   | AFVVPGLTDADGVGYVAQGEGVLTVIENGEKR | 182-213 | 33.80% |
|     |                                   | ALRPFDEVSR                       | 154-163 | 33.80% |
|     |                                   | DTFNLLEQRPK                      | 339-349 | 33.80% |
|     |                                   | EIASSRGSSNLQVVCFEINAER           | 483-504 | 33.80% |
|     |                                   | EVQEVFR                          | 535-541 | 33.80% |
|     |                                   | FHALAQHDVR                       | 365-374 | 33.80% |
|     |                                   | FNLLEQRPK                        | 341-349 | 33.80% |
|     |                                   | FQYFSAK                          | 257-263 | 33.80% |
|     |                                   | FQYFSAKPLLASLSK                  | 257-271 | 33.80% |
|     |                                   | GVGYVAQGEGVLTVIENGEK             | 193-212 | 33.80% |
|     |                                   | GVGYVAQGEGVLTVIENGEKR            | 193-213 | 33.80% |
|     |                                   | HALAQHDVR                        | 366-374 | 33.80% |
|     |                                   | HGQGEREEEQGR                     | 102-113 | 33.80% |
|     |                                   | LAVVLEGEGEVEIVCPHLGR             | 397-416 | 33.80% |
|     |                                   | LYEADAR                          | 357-363 | 33.80% |
|     |                                   | NLLEQRPK                         | 342-349 | 33.80% |
|     |                                   | PLLASLSK                         | 264-271 | 33.80% |
|     |                                   | PLPPFR                           | 329-334 | 33.80% |
|     |                                   | QGDVIVAPAGSIMHLANTDGR            | 219-239 | 33.80% |
|     |                                   | QGDVIVAPAGSIMHLANTDGRR           | 219-240 | 33.80% |
|     |                                   | RPYVFGPR                         | 132-139 | 33.80% |
|     |                                   | SAKPLLASLSK                      | 261-271 | 33.80% |
|     |                                   | SDHGFVK                          | 147-153 | 33.80% |
|     |                                   | SFHALAQHDVR                      | 364-374 | 33.80% |
|     |                                   | TFNLLEQRPK                       | 340-349 | 33.80% |
| DB1 | Globulin 3<br>[Triticum aestivum] | VAIMEVNPR                        | 173-181 | 33.80% |
|     | Serpin 2                          | APEIASQVNSWVENVTGLIR             | 141-161 | 85.60% |

|     |                                     |                                                |         |        |
|-----|-------------------------------------|------------------------------------------------|---------|--------|
| DB1 | [Triticum aestivum]                 | ATDVCLSLVAHQTR                                 | 6-18    | 85.60% |
|     |                                     | ATTLATDVCLSLVAHQTR                             | 2-18    | 85.60% |
|     |                                     | DDLWTLAK                                       | 255-262 | 85.60% |
|     |                                     | DQLVAILGNENAGGPEGLHSLAEQVVQLVLADASITGDPR       | 62-101  | 85.60% |
|     |                                     | EANLSEMVNSQVDLFLSSVFHK                         | 314-335 | 85.60% |
|     |                                     | EIASQVNSWVENVTGLIR                             | 143-161 | 85.60% |
|     |                                     | EILPEGSIDYTTR                                  | 162-174 | 85.60% |
|     |                                     | FHLLNGNTVQTPF                                  | 201-213 | 85.60% |
|     |                                     | FHLLNGNTVQTPFMSSTNK                            | 201-219 | 85.60% |
|     |                                     | GLWTEKFDESK                                    | 185-195 | 85.60% |
|     |                                     | ISFGFEATNLLK                                   | 292-303 | 85.60% |
|     |                                     | LASAISSDPESATGNVAFSPVSLHVALSLITAGAGGTTR        | 23-61   | 85.60% |
|     |                                     | LGNALYFK                                       | 177-184 | 85.60% |
|     |                                     | LLPERR                                         | 249-254 | 85.60% |
|     |                                     | LSTESEFIEK                                     | 264-273 | 85.60% |
|     |                                     | LVLGNALYFK                                     | 175-184 | 85.60% |
|     |                                     | QFSMYILLPER                                    | 243-253 | 85.60% |
|     |                                     | QFSMYILLPERR                                   | 243-254 | 85.60% |
|     |                                     | QYISSSDGLK                                     | 220-229 | 85.60% |
|     |                                     | RDDLWTLAK                                      | 254-262 | 85.60% |
|     |                                     | RLSTESEFIEK                                    | 263-273 | 85.60% |
|     |                                     | SFVEVNEQGTEAAAATSVAIEQQQMPIVMDFVADHPF<br>LFLIR | 336-377 | 85.60% |
|     |                                     | SLGLQLPFSR                                     | 304-313 | 85.60% |
|     |                                     | TKYDKFHLLNGNTVQTPFMSSTNK                       | 196-219 | 85.60% |
|     |                                     | VAFANGVFVDASLSLKPSFQELAVCNYK                   | 102-129 | 85.60% |
|     |                                     | VVVDQFMLPK                                     | 280-289 | 85.60% |
|     |                                     | YDKFHLLNGNTVQTPFMSSTNK                         | 198-219 | 85.60% |
| DB2 | Peroxidase 1 [Triticum<br>aestivum] | AAEPPVAR                                       | 26-33   | 72.60% |
| DB2 | Peroxidase 1 [Triticum<br>aestivum] | ADILALAAR                                      | 133-141 | 72.60% |
|     |                                     | ALLRPLGLDATDLVTISGGHTIGQAHCSSFEDR              | 186-218 | 72.60% |
|     |                                     | APPNLTLRPSAFK                                  | 100-112 | 72.60% |
|     |                                     | ASVLLDGSATGPGEQQAPPNLTLRPSAFK                  | 84-112  | 72.60% |

|     |                                  |                                          |         |        |
|-----|----------------------------------|------------------------------------------|---------|--------|
|     |                                  | ATGPGEQQAPPNLTLRPSAFK                    | 92-112  | 72.60% |
|     |                                  | AVNDIRDR                                 | 113-120 | 72.60% |
|     |                                  | AVNDIRDRLER                              | 113-123 | 72.60% |
|     |                                  | AVVSCADILALAAR                           | 128-141 | 72.60% |
|     |                                  | CADILALAAR                               | 132-141 | 72.60% |
|     |                                  | DASVLLDGSATGPGEQQAPPNLTLRPSAFK           | 83-112  | 72.60% |
|     |                                  | DFFEQFGVSMGK                             | 298-309 | 72.60% |
|     |                                  | DFFEQFGVSMGKMGQMR                        | 298-314 | 72.60% |
|     |                                  | DQDLFTNDITRPIVER                         | 276-291 | 72.60% |
|     |                                  | DSVVVSGGPDYR                             | 142-153 | 72.60% |
|     |                                  | DSVVVSGGPDYRVPLGR                        | 142-158 | 72.60% |
|     |                                  | EGLFVSDQDLFTNDITR                        | 270-286 | 72.60% |
|     |                                  | EGLFVSDQDLFTNDITRPIVER                   | 270-291 | 72.60% |
|     |                                  | EQQAPPNLTLRPSAFK                         | 97-112  | 72.60% |
|     |                                  | FEQFGVSMGK                               | 300-309 | 72.60% |
|     |                                  | FPRPDPTINPPFLAR                          | 220-234 | 72.60% |
|     |                                  | FVSDQDLFTNDITRPIVER                      | 273-291 | 72.60% |
|     |                                  | GAVVSCADILALAAR                          | 127-141 | 72.60% |
|     |                                  | GFVQDAVR                                 | 53-60   | 72.60% |
|     |                                  | GFVQDAVRK                                | 53-61   | 72.60% |
|     |                                  | GLDATDLVTISGGHTIGQAHCSSFEDR              | 192-218 | 72.60% |
|     |                                  | GLFVSDQDLFTNDITRPIVER                    | 271-291 | 72.60% |
|     |                                  | GSATGPGEQQAPPNLTLRPSAFK                  | 90-112  | 72.60% |
|     |                                  | KDIGLAAGLLR                              | 61-71   | 72.60% |
|     |                                  | LFPRPDPTIN                               | 219-228 | 72.60% |
|     |                                  | LFPRPDPTINPPFL                           | 219-232 | 72.60% |
|     |                                  | LFPRPDPTINPPFLAR                         | 219-234 | 72.60% |
|     |                                  | LHFHDCFVQG                               | 72-81   | 72.60% |
|     |                                  | LHFHDCFVQGCASVLLDGSATGPGEQQAPPNLTLRPSAFK | 72-112  | 72.60% |
| DB2 | Peroxidase 1 [Triticum aestivum] | LRPLGLDATDLVTISGGHTIGQAHCSSFEDR          | 188-218 | 72.60% |
|     |                                  | LSFDFYR                                  | 35-41   | 72.60% |
|     |                                  | LTLRPSAFK                                | 104-112 | 72.60% |
|     |                                  | NVFDNQYYVDLVNR                           | 256-269 | 72.60% |
|     |                                  | PAPSSNVPSLLALLR                          | 175-189 | 72.60% |



|     |                                     |                                                         |         |        |
|-----|-------------------------------------|---------------------------------------------------------|---------|--------|
|     |                                     | PDPTINPPFLAR                                            | 223-234 | 72.60% |
|     |                                     | PGEQQAPPNLTLRPSAFK                                      | 95-112  | 72.60% |
|     |                                     | PLGLDATDLVTISGGH                                        | 190-205 | 72.60% |
|     |                                     | PLGLDATDLVTISGGHTIGQAH                                  | 190-211 | 72.60% |
|     |                                     | PLGLDATDLVTISGGHTIGQAHCSSFEDR                           | 190-218 | 72.60% |
|     |                                     | PPNLTLRPSAFK                                            | 101-112 | 72.60% |
|     |                                     | PRPDPTINPPFLAR                                          | 221-234 | 72.60% |
|     |                                     | PSSNVPSLLALLR                                           | 177-189 | 72.60% |
|     |                                     | QAPPNLTLRPSAFK                                          | 99-112  | 72.60% |
|     |                                     | QDVLSDLAPSSN                                            | 168-180 | 72.60% |
|     |                                     | QDVLSDLAPSSNVPSL                                        | 168-184 | 72.60% |
|     |                                     | QDVLSDLAPSSNVPSLL                                       | 168-185 | 72.60% |
|     |                                     | QDVLSDLAPSSNVPSLLA                                      | 168-186 | 72.60% |
|     |                                     | QDVLSDLAPSSNVPSLLAL                                     | 168-187 | 72.60% |
|     |                                     | QDVLSDLAPSSNVPSLLALL                                    | 168-188 | 72.60% |
|     |                                     | QDVLSDLAPSSNVPSLLALLR                                   | 168-189 | 72.60% |
|     |                                     | QDVLSDLAPSSNVPSLLALLRPL                                 | 168-191 | 72.60% |
|     |                                     | QDVLSDLAPSSNVPSLLALLRPLGLDATDLVTISGGH                   | 168-205 | 72.60% |
|     |                                     | QDVLSDLAPSSNVPSLLALLRPLGLDATDLVTISGG-<br>HTIGQAH        | 168-211 | 72.60% |
|     |                                     | QDVLSDLAPSSNVPSLLALLRPLGLDATDLVTISGGH-<br>TIGQAHCSSFEDR | 168-218 | 72.60% |
|     |                                     | QYYVDLVNR                                               | 261-269 | 72.60% |
|     |                                     | RGLSFDFYR                                               | 33-41   | 72.60% |
|     |                                     | SATGPGEQQAPPNLTLRPSAFK                                  | 91-112  | 72.60% |
|     |                                     | SCADILALAAR                                             | 131-141 | 72.60% |
|     |                                     | SDQDLFTNDITRPIVER                                       | 275-291 | 72.60% |
|     |                                     | SFDFYR                                                  | 36-41   | 72.60% |
| DB2 | Peroxidase 1 [Triticum<br>aestivum] | SFDFYRR                                                 | 36-42   | 72.60% |
|     |                                     | SGGPDYRVPLGR                                            | 147-158 | 72.60% |
|     |                                     | SQRDFFEQFGVSMGK                                         | 295-309 | 72.60% |
|     |                                     | SVVVSGGPDYR                                             | 143-153 | 72.60% |
|     |                                     | TIGQAHCSSFEDR                                           | 206-218 | 72.60% |
|     |                                     | TISGGHTIGQAHCSSFEDR                                     | 200-218 | 72.60% |

|     |                                   |                                  |         |        |
|-----|-----------------------------------|----------------------------------|---------|--------|
|     |                                   | TPNVFDNQYYVDLVN                  | 254-268 | 72.60% |
|     |                                   | TPNVFDNQYYVDLVNR                 | 254-269 | 72.60% |
|     |                                   | TPNVFDNQYYVDLVNREGLF             | 254-273 | 72.60% |
|     |                                   | TSDLGEVR                         | 317-234 | 72.60% |
|     |                                   | TSDLGEVRR                        | 317-235 | 72.60% |
|     |                                   | TVLDVRTPNVFDNQYYVDLVNR           | 248-269 | 72.60% |
|     |                                   | VFDNQYYVDLVNR                    | 257-269 | 72.60% |
|     |                                   | VLLDGSATGPGEQQAPPNLTLRPSAFK      | 86-112  | 72.60% |
|     |                                   | VNDIRDR                          | 114-120 | 72.60% |
|     |                                   | VQDAVRK                          | 55-61   | 72.60% |
|     |                                   | VSDQDLFTNDITRPIVER               | 274-291 | 72.60% |
|     |                                   | VVSCADILALAAR                    | 129-141 | 72.60% |
|     |                                   | VVSGGPDYR                        | 145-153 | 72.60% |
|     |                                   | VVSGGPDYRVPLGR                   | 145-158 | 72.60% |
|     |                                   | VVVSGGPDYR                       | 144-153 | 72.60% |
|     |                                   | YYVDLVNR                         | 262-269 | 72.60% |
| DB2 | Globulin 3<br>[Triticum aestivum] | AFVVPGLTDADGVGYVAQGEGVLTVIENGEK  | 182-212 | 30.60% |
|     |                                   | AFVVPGLTDADGVGYVAQGEGVLTVIENGEKR | 182-213 | 30.60% |
|     |                                   | AKPLLASLSK                       | 262-271 | 30.60% |
|     |                                   | ALAQHDVR                         | 367-374 | 30.60% |
|     |                                   | ALRPFDEVSR                       | 154-163 | 30.60% |
|     |                                   | DTFNLLEQRPK                      | 339-349 | 30.60% |
|     |                                   | EVQEVFR                          | 535-541 | 30.60% |
|     |                                   | FHALAQHDVR                       | 365-374 | 30.60% |
|     |                                   | FNLLEQRPK                        | 341-349 | 30.60% |
|     |                                   | FQYFSAKPL                        | 257-265 | 30.60% |
|     |                                   | FQYFSAKPLLASLSK                  | 257-271 | 30.60% |
| DB2 | Globulin 3<br>[Triticum aestivum] | FSAKPLLASLSK                     | 260-271 | 30.60% |
|     |                                   | HALAQHDVR                        | 366-374 | 30.60% |
|     |                                   | IVAPAGSIMHLANTDGR                | 223-239 | 30.60% |
|     |                                   | LRPFDEVSR                        | 155-163 | 30.60% |
|     |                                   | LYEADAR                          | 357-363 | 30.60% |
|     |                                   | NLLEQRPK                         | 342-349 | 30.60% |
|     |                                   | PAGSIMHLANTDGRR                  | 226-240 | 30.60% |

|  |  |                                  |         |        |
|--|--|----------------------------------|---------|--------|
|  |  | PGLTDADGVGYVAQGEGVLTVIENGEKR     | 186-213 | 30.60% |
|  |  | PLLASLSK                         | 264-271 | 30.60% |
|  |  | PLLASLSKR                        | 264-272 | 30.60% |
|  |  | QASEGDQGHHWPLPPFR                | 318-334 | 30.60% |
|  |  | QGDVIVAPAGSIMHLAN                | 219-235 | 30.60% |
|  |  | QGDVIVAPAGSIMHLANTDGR            | 219-239 | 30.60% |
|  |  | QGDVIVAPAGSIMHLANTDGRR           | 219-240 | 30.60% |
|  |  | QYFSAKPLLASLSK                   | 258-271 | 30.60% |
|  |  | RAFVVPGLTDADGVGYVAQGEGVLTVIENGEK | 181-212 | 30.60% |
|  |  | RLYEADAR                         | 356-363 | 30.60% |
|  |  | RPFDEVSR                         | 156-163 | 30.60% |
|  |  | RPYVFGPR                         | 132-139 | 30.60% |
|  |  | SAKPLLASLSK                      | 261-271 | 30.60% |
|  |  | SDHGFVKALRPFDEVSR                | 147-163 | 30.60% |
|  |  | SFHALAQHDVR                      | 364-374 | 30.60% |
|  |  | TAPYLNTQSFK                      | 386-396 | 30.60% |
|  |  | TFNLLEQRPK                       | 340-349 | 30.60% |
|  |  | VAIMEVNP                         | 173-181 | 30.60% |
|  |  | VAPAGSIMHLANTDGR                 | 224-239 | 30.60% |
|  |  | VAVANITPGSMTAPYLNTQSFK           | 375-396 | 30.60% |
|  |  | YFSAKPLLASLSK                    | 259-271 | 30.60% |
