# Supplementary material for: A Mouse-Based Method to Monitor Wheat Allergens in Novel Wheat Lines and Varieties Created by Crossbreeding: Proof-of-Concept Using Durum and A. tauschii Wheats
Source: MDPI journal article supplement (doi:10.3390/ijms23126505), 2022-06-10
Supplement: s1 [file s1]

**Table S1.** Peptides sequences, positions, and coverage for wheat allergens identified in boiled/reduced tetraploid durum wheat.

| <b>IgE-binding band</b> | <b>Protein</b>                     | <b>Sequence</b>         | <b>Position</b> | <b>Percent coverage</b> |
|-------------------------|------------------------------------|-------------------------|-----------------|-------------------------|
| TB1                     | Globulin-3B<br>[Triticum aestivum] | AKDQQDEGFVAGPEQQEQER    | 459-478         | 48.60%                  |
|                         |                                    | AKDQQDEGFVAGPEQQEQERGDR | 459-481         | 48.60%                  |
|                         |                                    | ALRPFDEVSR              | 147-156         | 48.60%                  |
|                         |                                    | ASEEQLR                 | 265-271         | 48.60%                  |
|                         |                                    | DQQDEGFVAGPEQQEQER      | 461-478         | 48.60%                  |
|                         |                                    | DQQDEGFVAGPEQQEQERGDR   | 461-481         | 48.60%                  |
|                         |                                    | EASEGGQGHHWLPPFR        | 276-292         | 48.60%                  |
|                         |                                    | EDQQQHGRHEQEEQGSHGR     | 41-60           | 48.60%                  |
|                         |                                    | EEHGRHEQGR              | 99-108          | 48.60%                  |
|                         |                                    | EVQEVFR                 | 452-458         | 48.60%                  |
|                         |                                    | GEGERDEEHGDSR           | 112-124         | 48.60%                  |
|                         |                                    | GRHGEGEREEEEGR          | 75-88           | 48.60%                  |
|                         |                                    | GRHGEGEREEHGR           | 91-103          | 48.60%                  |
|                         |                                    | HEQEEQGSHGR             | 49-60           | 48.60%                  |
|                         |                                    | HGEGEREEEEGR            | 77-88           | 48.60%                  |
|                         |                                    | HGEGEREEEEGRGR          | 77-90           | 48.60%                  |
|                         |                                    | HGEGEREEHGR             | 93-103          | 48.60%                  |
|                         |                                    | HGEGEREEHGRHEQGR        | 93-108          | 48.60%                  |
|                         |                                    | HGEGGREEEQGR            | 61-72           | 48.60%                  |
|                         |                                    | LYEADAR                 | 315-321         | 48.60%                  |
|                         |                                    | PLLASLSK                | 222-229         | 48.60%                  |
|                         |                                    | PLLASLSKR               | 222-230         | 48.60%                  |
|                         |                                    | PYVFGPR                 | 126-132         | 48.60%                  |
|                         |                                    | QQQEEEEISIVR            | 252-264         | 48.60%                  |
|                         |                                    | RGEGERDEEHGDSR          | 111-124         | 48.60%                  |
|                         |                                    | RPFDEVSR                | 149-156         | 48.60%                  |
|                         |                                    | RPYVFGPR                | 125-132         | 48.60%                  |
|                         |                                    | RQQQEEEEISIVR           | 251-264         | 48.60%                  |
|                         |                                    | RSYSVR                  | 208-213         | 48.60%                  |
|                         |                                    | SDHGFVK                 | 140-146         | 48.60%                  |

|     |                                    |                             |         |        |
|-----|------------------------------------|-----------------------------|---------|--------|
|     |                                    | SFHALAQH DVR                | 322-332 | 48.60% |
|     |                                    | TSDEQLDR                    | 238-245 | 48.60% |
| TB1 | Globulin-3B<br>[Triticum aestivum] | VAIMEVNPR                   | 166-174 | 48.60% |
|     |                                    | VAVANITPGSMTAPYLNTQSFK      | 333-354 | 48.60% |
| TB1 | Serp<br>[Triticum aestivum]        | AAEVTAQVNSWVEK              | 138-151 | 60.30% |
|     |                                    | AEAQSVDFQTK                 | 127-137 | 60.30% |
|     |                                    | ATTLATDVR                   | 2-10    | 60.30% |
|     |                                    | DILPAGSISNTTR               | 159-171 | 60.30% |
|     |                                    | DQLVATLGEGER                | 62-75   | 60.30% |
|     |                                    | EDTSGVVLFIGHVNVPLR          | 379-396 | 60.30% |
|     |                                    | GAWTDQFDSR                  | 182-191 | 60.30% |
|     |                                    | HLGLQLPFSDEADLSEMVDSPMPQGLR | 301-327 | 60.30% |
|     |                                    | ISFGIEASDLLK                | 289-300 | 60.30% |
|     |                                    | ISSVFHK                     | 328-334 | 60.30% |
|     |                                    | LHALAEQVVQFVLADASYADSPR     | 76-98   | 60.30% |
|     |                                    | LSAEPELLER                  | 261-270 | 60.30% |
|     |                                    | LSIAHQTR                    | 11-18   | 60.30% |
|     |                                    | LVLGNALYFK                  | 172-181 | 60.30% |
|     |                                    | QYISSSDGLK                  | 217-226 | 60.30% |
|     |                                    | SGIWSLAEK                   | 252-260 | 60.30% |
|     |                                    | SIAHQTR                     | 12-18   | 60.30% |
|     |                                    | TFVEVNETGTEAAAAATIAK        | 335-353 | 60.30% |
|     |                                    | VLKLPYK                     | 227-233 | 60.30% |
|     |                                    | VTTGLIK                     | 152-158 | 60.30% |
|     |                                    | VTTGLIKDILPAGSISNTTR        | 152-171 | 60.30% |
|     |                                    | YKAEAQSVDFQTK               | 125-137 | 60.30% |
|     |                                    | YKAEAQSVDFQTKAAEVTAQVNSWVEK | 125-151 | 60.30% |
|     |                                    | AAEVTTQVNSWVEK              | 138-151 | 50.00% |
|     |                                    | AETQSVDFQTK                 | 127-137 | 50.00% |
|     |                                    | ATTLATDVR                   | 2-10    | 50.00% |
|     |                                    | DILPPGSIDNTTK               | 159-171 | 50.00% |
|     |                                    | DQLVATLGTGK                 | 62-72   | 50.00% |
|     |                                    | EDISGVVLFMGMHVVNPLLSS       | 379-398 | 50.00% |
|     |                                    | GAWTEQFDSYGTK               | 182-194 | 50.00% |

|     |                                    |                                 |         |        |
|-----|------------------------------------|---------------------------------|---------|--------|
|     |                                    | IKDILPPGSIDNTTK                 | 157-171 | 50.00% |
| TB1 | Serp<br>[Triticum aestivum]        | ISFGIEASDLLK                    | 289-300 | 50.00% |
|     |                                    | LASTISSNPK                      | 23-32   | 50.00% |
|     |                                    | LSAEPDFLER                      | 261-270 | 50.00% |
|     |                                    | LSIAHQTR                        | 11-18   | 50.00% |
|     |                                    | LVLANALYFK                      | 172-181 | 50.00% |
|     |                                    | QFFMYILLPEAPGGLSSLAEK           | 240-260 | 50.00% |
|     |                                    | SIAHQTR                         | 12-18   | 50.00% |
|     |                                    | VLKLPYK                         | 227-233 | 50.00% |
|     |                                    | VSSVFHQAFVEVNEQGTEAAASTAIK      | 328-353 | 50.00% |
|     |                                    | YKAETQSVDQTK                    | 125-137 | 50.00% |
| TB1 | Globulin-3A<br>[Triticum aestivum] | AFVVPGLTDADGVGYVAQGEGVLTVIENGEK | 182-212 | 71.40% |
|     |                                    | AKDQQDEGFVAGPEQQQEHER           | 542-562 | 71.40% |
|     |                                    | AKDQQDEGFVAGPEQQQEHERGDR        | 542-565 | 71.40% |
|     |                                    | ALRPFDEVSR                      | 154-163 | 71.40% |
|     |                                    | ASEEQLR                         | 307-313 | 71.40% |
|     |                                    | CQQDRPR                         | 48-54   | 71.40% |
|     |                                    | DDQQQHGR                        | 66-73   | 71.40% |
|     |                                    | DDQQQHGRHEQEEQGR                | 66-81   | 71.40% |
|     |                                    | DQQDEGFVAGPEQQQEHER             | 544-562 | 71.40% |
|     |                                    | DQQDEGFVAGPEQQQEHERGDR          | 544-565 | 71.40% |
|     |                                    | DTFNLLEQR                       | 339-347 | 71.40% |
|     |                                    | DTFNLLEQRPK                     | 339-349 | 71.40% |
|     |                                    | EVQEVFR                         | 535-541 | 71.40% |
|     |                                    | FQYFSAK                         | 257-263 | 71.40% |
|     |                                    | FQYFSAKPL                       | 257-265 | 71.40% |
|     |                                    | FQYFSAKPLLASLSK                 | 257-271 | 71.40% |
|     |                                    | GDSRDTFNLLEQRPK                 | 335-349 | 71.40% |
|     |                                    | GEGERDEEHGDGR                   | 119-131 | 71.40% |
|     |                                    | GQGEREEEQGR                     | 103-113 | 71.40% |
|     |                                    | GSAFVVPPGHPVVEIASSR             | 470-488 | 71.40% |
|     |                                    | GSGSESEEEQDQQR                  | 446-459 | 71.40% |
|     |                                    | GSGSESEEEQDQQRVETVR             | 446-464 | 71.40% |
|     |                                    | GSSNLQVVCFEINAER                | 489-504 | 71.40% |

|     |                                    |                       |         |        |
|-----|------------------------------------|-----------------------|---------|--------|
| TB1 | Globulin-3A<br>[Triticum aestivum] | GSSNLQVVCFEINAERNER   | 489-507 | 71.40% |
|     |                                    | HEQEEQGR              | 74-81   | 71.40% |
|     |                                    | HEQEEQGRGHGR          | 74-85   | 71.40% |
|     |                                    | HGEGEREEEQGR          | 86-97   | 71.40% |
|     |                                    | ILHTISVPGK            | 247-256 | 71.40% |
|     |                                    | LDDPAQELAFGR          | 520-531 | 71.40% |
|     |                                    | LDDPAQELAFGRPAR       | 520-534 | 71.40% |
|     |                                    | LGSLLGSR              | 285-292 | 71.40% |
|     |                                    | LYEADAR               | 357-363 | 71.40% |
|     |                                    | PLLASLSK              | 264-271 | 71.40% |
|     |                                    | PLLASLSKR             | 264-272 | 71.40% |
|     |                                    | PYVFGPR               | 133-139 | 71.40% |
|     |                                    | QASEGDQGHWWPLPPFR     | 318-334 | 71.40% |
|     |                                    | QGDVIVAPAGSIMHLANTDGR | 219-239 | 71.40% |
|     |                                    | QGDVIVAPAGSIMHLANTDGR | 219-240 | 71.40% |
|     |                                    | QGKEEEEK              | 293-300 | 71.40% |
|     |                                    | REQEHGK               | 421-427 | 71.40% |
|     |                                    | REQEHGKGR             | 421-429 | 71.40% |
|     |                                    | RGGERDEEHGDGR         | 118-131 | 71.40% |
|     |                                    | RGQGEREEEQGR          | 102-113 | 71.40% |
|     |                                    | RGSGSESEEEQDQQR       | 445-459 | 71.40% |
|     |                                    | RGSGSESEEEQDQQR       | 445-464 | 71.40% |
|     |                                    | RKLVIK                | 240-246 | 71.40% |
|     |                                    | RPFDEVSR              | 156-163 | 71.40% |
|     |                                    | RPYVFGPR              | 132-139 | 71.40% |
|     |                                    | RRGSGSESEEEQDQQR      | 444-459 | 71.40% |
|     |                                    | RSYTVR                | 213-218 | 71.40% |
|     |                                    | RVLTAALK              | 272-279 | 71.40% |
|     |                                    | SDHGFVK               | 147-153 | 71.40% |
|     |                                    | SEEEEDRR              | 432-440 | 71.40% |
|     |                                    | SEEEEDRRQQR           | 432-443 | 71.40% |
|     |                                    | SFHALAQHDVR           | 364-374 | 71.40% |
|     |                                    | VAIMEVNPR             | 173-181 | 71.40% |
|     | Globulin-3A                        | VAVANITPGSMTAPYLNTQSK | 375-396 | 71.40% |

|     |                                                              |                              |         |        |
|-----|--------------------------------------------------------------|------------------------------|---------|--------|
| TB1 | [Triticum aestivum]                                          | VLTAALK                      | 273-279 | 71.40% |
|     |                                                              | WRSEEEEDRR                   | 430-440 | 71.40% |
| TB1 | Glyceraldehyde-3-phosphate dehydrogenase [Triticum aestivum] | AAIKEESEGNLK                 | 262-273 | 81.00% |
|     |                                                              | AASFNIIPSSTGAAK              | 203-217 | 81.00% |
|     |                                                              | AGIALNDNFVK                  | 301-311 | 81.00% |
|     |                                                              | DAPMFVCGVNEK                 | 129-140 | 81.00% |
|     |                                                              | DKAAAHIK                     | 108-115 | 81.00% |
|     |                                                              | EESEGNLK                     | 266-273 | 81.00% |
|     |                                                              | EVAVFGCR                     | 75-82   | 81.00% |
|     |                                                              | EYKSDIDIVSNASCTTNCLAPLAK     | 141-164 | 81.00% |
|     |                                                              | FGIVEGLMTTVHAMTATQK          | 170-188 | 81.00% |
|     |                                                              | GILGYVDEDLVSTDFQGDNR         | 274-293 | 81.00% |
|     |                                                              | IGINGFGR                     | 6-13    | 81.00% |
|     |                                                              | KVIISAPSK                    | 120-128 | 81.00% |
|     |                                                              | LAKPATYDQIK                  | 251-261 | 81.00% |
|     |                                                              | LTGMAFR                      | 230-236 | 81.00% |
|     |                                                              | LVSWDYDNEWGYSTR              | 312-325 | 81.00% |
|     |                                                              | NPEEIPWAAAGA EYVVESTGVFTDKDK | 83-109  | 81.00% |
|     |                                                              | PATYDQIK                     | 254-261 | 81.00% |
|     |                                                              | SDIDIVSNASCTTNCLAPLAK        | 144-164 | 81.00% |
|     |                                                              | SSIFDAK                      | 294-300 | 81.00% |
|     |                                                              | TLLFGEK                      | 68-74   | 81.00% |
|     |                                                              | TLLFGEKEVAVFGCR              | 68-82   | 81.00% |
|     |                                                              | TVDGPSSK                     | 189-196 | 81.00% |
|     |                                                              | VALQSPDVELVAVNDPFITTDYMTYMFK | 21-48   | 81.00% |
|     |                                                              | VIISAPSK                     | 121-128 | 81.00% |
|     |                                                              | VLPELNGK                     | 222-229 | 81.00% |
|     |                                                              | VPTVDVSVVDLTVR               | 237-250 | 81.00% |
|     |                                                              | VVDLIR                       | 326-331 | 81.00% |
|     |                                                              | YDTVHGQWK                    | 49-57   | 81.00% |
| TB1 | Glyceraldehyde-3-phosphate dehydrogenase [Triticum aestivum] | AASFNIIPSSTGAAK              | 203-217 | 65.30% |
|     |                                                              | AASYDDIKK                    | 254-262 | 65.30% |
|     |                                                              | AGIALNDHFVK                  | 301-311 | 65.30% |
|     |                                                              | DDKTLLFGEKPVTVFGVR           | 65-82   | 65.30% |

|     |                                                                       |                                      |         |        |
|-----|-----------------------------------------------------------------------|--------------------------------------|---------|--------|
|     |                                                                       | DKAAHLK                              | 108-115 | 65.30% |
|     |                                                                       | GIMGYVEEDLVSTDFVGDSR                 | 274-293 | 65.30% |
|     |                                                                       | IGINGFGR                             | 6-13    | 65.30% |
|     |                                                                       | IINDNFGIIEGLMTTVHAITATQK             | 165-188 | 65.30% |
|     |                                                                       | KVVISAPSK                            | 120-128 | 65.30% |
|     |                                                                       | LTGMSFR                              | 230-236 | 65.30% |
|     |                                                                       | LVSWDNEWGYSNR                        | 312-325 | 65.30% |
|     |                                                                       | NPEEIPWGEAGADYVVESTGVFTDKDK          | 83-109  | 65.30% |
|     |                                                                       | SSIFDAK                              | 294-300 | 65.30% |
|     |                                                                       | TLLFGEK                              | 68-74   | 65.30% |
|     |                                                                       | TLLFGEKPVTVFGVR                      | 68-82   | 65.30% |
|     |                                                                       | TVDGPSSK                             | 189-196 | 65.30% |
|     |                                                                       | VLPELNGK                             | 222-229 | 65.30% |
|     |                                                                       | VPTVDVSVVDLTVR                       | 237-250 | 65.30% |
|     |                                                                       | VVDLIR                               | 326-331 | 65.30% |
|     |                                                                       | VVISAPSK                             | 121-128 | 65.30% |
|     |                                                                       | YDTVHGHWK                            | 49-57   | 65.30% |
| TB2 | Glyceraldehyde-3-phosphate dehydrogenase, partial [Triticum aestivum] | AASFNIIPSSTGAAK                      | 202-216 | 76.10% |
|     |                                                                       | AASFNIIPSSTGAAKAVGK                  | 202-220 | 76.10% |
|     |                                                                       | AASYDDIK                             | 253-260 | 76.10% |
|     |                                                                       | AGIALNDHFVK                          | 300-310 | 76.10% |
|     |                                                                       | DAPMFVVGVNEDK                        | 128-140 | 76.10% |
|     |                                                                       | DAPMFVVGVNEDKYTSVDNIVSNASCTTNCLAPLAK | 128-163 | 76.10% |
|     |                                                                       | DDKTLLFGEKPVTVFGVR                   | 64-81   | 76.10% |
|     |                                                                       | GIMGYVEEDLVSTDFVGDSR                 | 273-292 | 76.10% |
|     |                                                                       | IGINGFGR                             | 5-12    | 76.10% |
|     |                                                                       | IINDNFGIIEGLMTTVHAITATQK             | 164-187 | 76.10% |
|     |                                                                       | KVVISAPSK                            | 119-127 | 76.10% |
| TB2 | Glyceraldehyde-3-phosphate dehydrogenase [Triticum aestivum]          | LKGIMGYVEEDLVSTDFVGDSR               | 271-292 | 76.10% |
|     |                                                                       | LTGMSFR                              | 229-235 | 76.10% |
|     |                                                                       | LVSWDNEWGYSNR                        | 311-324 | 76.10% |
|     |                                                                       | NPEEIPWGEAGADYVVESTGVFTDKDK          | 82-108  | 76.10% |
|     |                                                                       | PVTVFGVR                             | 74-81   | 76.10% |
|     |                                                                       | SSIFDAK                              | 293-299 | 76.10% |

|     |                                                              |                              |         |        |
|-----|--------------------------------------------------------------|------------------------------|---------|--------|
|     |                                                              | TLLFGEK                      | 67-73   | 76.10% |
|     |                                                              | TLLFGEKPVTVFGVR              | 67-81   | 76.10% |
|     |                                                              | TTNCLAPLAK                   | 154-163 | 76.10% |
|     |                                                              | TVDGPSSK                     | 188-195 | 76.10% |
|     |                                                              | VLPELNGK                     | 221-228 | 76.10% |
|     |                                                              | VLPELNGKLTGMSFR              | 221-235 | 76.10% |
|     |                                                              | VPTVDVSVVDLTVR               | 236-249 | 76.10% |
|     |                                                              | VVDLIR                       | 325-330 | 76.10% |
|     |                                                              | VVISAPSK                     | 120-127 | 76.10% |
|     |                                                              | YDTVHGHWK                    | 48-56   | 76.10% |
|     |                                                              | AAIKEESEGNLK                 | 262-273 | 76.60% |
|     |                                                              | AASFNIIPSSTGAAK              | 203-217 | 76.60% |
|     |                                                              | AASFNIIPSSTGAAKAVGK          | 203-221 | 76.60% |
|     |                                                              | AGIALNDNFVK                  | 301-311 | 76.60% |
|     |                                                              | DAPMFVCGVNEK                 | 129-140 | 76.60% |
|     |                                                              | DAPMFVCGVNEKEYK              | 129-143 | 76.60% |
|     |                                                              | EVAVFGCR                     | 75-82   | 76.60% |
|     |                                                              | EYKSDIDIVSNASCTTNCLAPLAK     | 141-164 | 76.60% |
|     |                                                              | FGIVEGLMTTVHAMTATQK          | 170-188 | 76.60% |
|     |                                                              | GILGYVDEDLVSTDFQGDNR         | 274-293 | 76.60% |
|     |                                                              | HMHSSK                       | 332-337 | 76.60% |
|     |                                                              | KVIISAPSK                    | 120-128 | 76.60% |
|     |                                                              | KVIISAPSKDAPMFVCGVNEK        | 120-140 | 76.60% |
|     |                                                              | LAKPATYDQIK                  | 251-261 | 76.60% |
|     |                                                              | LTGMAFR                      | 230-236 | 76.60% |
|     |                                                              | LVSWYDNEWGYSTR               | 312-325 | 76.60% |
|     |                                                              | NPEEIPWAAAGAIEYVVESTGVFTDKDK | 83-109  | 76.60% |
| TB2 | Glyceraldehyde-3-phosphate dehydrogenase [Triticum aestivum] | PATYDQIK                     | 254-261 | 76.60% |
|     |                                                              | SDIDIVSNASCTTNCLAPLAK        | 144-164 | 76.60% |
|     |                                                              | SSIFDAK                      | 294-300 | 76.60% |
|     |                                                              | TLLFGQK                      | 68-74   | 76.60% |
|     |                                                              | TTNCLAPLAK                   | 155-164 | 76.60% |
|     |                                                              | TVDGPSSK                     | 189-196 | 76.60% |
|     |                                                              | VIISAPSK                     | 121-128 | 76.60% |

|     |                             |                             |         |        |
|-----|-----------------------------|-----------------------------|---------|--------|
|     |                             | VLPELNGK                    | 222-229 | 76.60% |
|     |                             | VLPELNGKLTGMAFR             | 222-236 | 76.60% |
|     |                             | VPTVDVSVVDLTVR              | 237-250 | 76.60% |
|     |                             | VVDLIR                      | 326-331 | 76.60% |
|     |                             | YDTVHGQWK                   | 49-57   | 76.60% |
| TB2 | Serp<br>[Triticum aestivum] | AAEVATQVNSWVEK              | 138-151 | 44.50% |
|     |                             | ATTLATDVR                   | 2-10    | 44.50% |
|     |                             | GAWTDQFDSSGTK               | 182-194 | 44.50% |
|     |                             | IKDILPSGSVDNTTK             | 157-171 | 44.50% |
|     |                             | ISFETEASDLLK                | 289-300 | 44.50% |
|     |                             | LASTISSNPK                  | 23-32   | 44.50% |
|     |                             | LSAEPDFLER                  | 261-270 | 44.50% |
|     |                             | LSAEPDFLERHIPR              | 261-274 | 44.50% |
|     |                             | LVLANALYFK                  | 172-181 | 44.50% |
|     |                             | PSFQELAVCK                  | 115-124 | 44.50% |
|     |                             | QFKLPK                      | 281-286 | 44.50% |
|     |                             | QFSMYILLPEAPGGLSNLAEK       | 240-260 | 44.50% |
|     |                             | QYLSSTDGLK                  | 217-226 | 44.50% |
|     |                             | VLKLPYK                     | 227-233 | 44.50% |
|     |                             | VSSVFHQAFVEVNEQGTEAAASTAIK  | 328-353 | 44.50% |
|     |                             | AAEVTAQVNSWVEK              | 138-151 | 62.30% |
|     |                             | AEAQSVDFQTK                 | 127-137 | 62.30% |
|     |                             | ATTLATDVR                   | 2-10    | 62.30% |
|     |                             | DILPAGSISNTTR               | 159-171 | 62.30% |
|     |                             | DQLVATLGEGER                | 62-75   | 62.30% |
|     |                             | EDTSGVVLFIGHVVNPLR          | 379-396 | 62.30% |
| TB2 | Serp<br>[Triticum aestivum] | GAWTDQFDSR                  | 182-191 | 62.30% |
|     |                             | HLGLQLPFSDEADLSEMVDSPMPQGLR | 301-327 | 62.30% |
|     |                             | ISFGIEASDLLK                | 289-300 | 62.30% |
|     |                             | ISSVFHK                     | 328-334 | 62.30% |
|     |                             | LHALAEQVVQFVLADASYADSPR     | 76-98   | 62.30% |
|     |                             | LSAPELLER                   | 261-270 | 62.30% |
|     |                             | LVLGNALYFK                  | 172-181 | 62.30% |
|     |                             | PSFQELAVCK                  | 115-124 | 62.30% |



|     |                                 |                                 |         |        |
|-----|---------------------------------|---------------------------------|---------|--------|
|     |                                 | QFKLPK                          | 281-286 | 62.30% |
|     |                                 | QYISSDGLK                       | 217-226 | 62.30% |
|     |                                 | SGIWSLAEK                       | 252-260 | 62.30% |
|     |                                 | TFVEVNETGTEAAAATIAK             | 335-353 | 62.30% |
|     |                                 | VLKLPYK                         | 227-233 | 62.30% |
|     |                                 | VTTGLIK                         | 152-158 | 62.30% |
|     |                                 | VTTGLIKDILPAGSISNTTR            | 152-171 | 62.30% |
|     |                                 | YKAEAQSVDFQTK                   | 125-137 | 62.30% |
|     |                                 | YKAEAQSVDFQTKAAEVTAQVNSWVEK     | 125-151 | 62.30% |
| TB2 | Globulin-3A [Triticum aestivum] | AFVVPGLTDADGVGYVAQGEGVLTVIENGEK | 182-212 | 58.20% |
|     |                                 | AKDQQDEGFVAGPEQQQEHER           | 542-562 | 58.20% |
|     |                                 | AKDQQDEGFVAGPEQQQEHERGDR        | 542-565 | 58.20% |
|     |                                 | ALRPFDEVSR                      | 154-163 | 58.20% |
|     |                                 | CVQECRDDQQQHGR                  | 60-73   | 58.20% |
|     |                                 | DDQQQHGR                        | 66-73   | 58.20% |
|     |                                 | DTFNLLEQRPK                     | 339-349 | 58.20% |
|     |                                 | EQEHGK                          | 422-427 | 58.20% |
|     |                                 | EVQEVFR                         | 535-541 | 58.20% |
|     |                                 | FQYFSAK                         | 257-263 | 58.20% |
|     |                                 | FQYFSAKPLLASLSK                 | 257-271 | 58.20% |
|     |                                 | GDSRDTFNLLEQRPK                 | 335-349 | 58.20% |
|     |                                 | GSAFVPPGHPVVEIASSR              | 470-488 | 58.20% |
|     |                                 | GSGSESEEEQDQQRVETVR             | 446-464 | 58.20% |
|     |                                 | GSSNLQVVCFEINAER                | 489-504 | 58.20% |
|     |                                 | HGGEREEEQGR                     | 86-97   | 58.20% |
| TB2 | Globulin-3A [Triticum aestivum] | ILHTISVPGK                      | 247-256 | 58.20% |
|     |                                 | LAVVLEGEGEVEIVCPHLGR            | 397-416 | 58.20% |
|     |                                 | LDDPAQELAFGR                    | 520-531 | 58.20% |
|     |                                 | LDDPAQELAFGRPAR                 | 520-534 | 58.20% |
|     |                                 | LGSLGSR                         | 285-292 | 58.20% |
|     |                                 | PLLASLSK                        | 264-271 | 58.20% |
|     |                                 | PLLASLSKR                       | 264-272 | 58.20% |
|     |                                 | PYVFGPR                         | 133-139 | 58.20% |
|     |                                 | QASEGDQGHHWPLPPFR               | 318-334 | 58.20% |

|     |                                                |                               |         |        |
|-----|------------------------------------------------|-------------------------------|---------|--------|
|     |                                                | QGDVIVAPAGSIMHLANTDGR         | 219-239 | 58.20% |
|     |                                                | QGDVIVAPAGSIMHLANTDGRR        | 219-240 | 58.20% |
|     |                                                | QGKEEEEK                      | 293-300 | 58.20% |
|     |                                                | REQEHGK                       | 421-427 | 58.20% |
|     |                                                | RGSGSESEEEQDQQR               | 445-459 | 58.20% |
|     |                                                | RPYVFGPR                      | 132-139 | 58.20% |
|     |                                                | RQASEGDQGHHWPLPPFR            | 317-334 | 58.20% |
|     |                                                | RVLTAALK                      | 272-279 | 58.20% |
|     |                                                | SEEEEDDRR                     | 432-440 | 58.20% |
|     |                                                | SFHALAQHDVR                   | 364-374 | 58.20% |
|     |                                                | VAIMEVNPR                     | 173-181 | 58.20% |
|     |                                                | VLTAALK                       | 273-279 | 58.20% |
|     |                                                | VWLAGR                        | 508-513 | 58.20% |
| TB2 | Unnamed protein product<br>[Triticum aestivum] | ADLNVPLDDAQK                  | 24-35   | 76.60% |
|     |                                                | AHASTEGVTK                    | 156-165 | 76.60% |
|     |                                                | ASIPTIK                       | 44-50   | 76.60% |
|     |                                                | ELDYLVGAVANPK                 | 179-191 | 76.60% |
|     |                                                | FAAGTDAIAK                    | 332-341 | 76.60% |
|     |                                                | FAAIVGGSK                     | 194-202 | 76.60% |
|     |                                                | FLRPSVAGFLMQK                 | 166-178 | 76.60% |
|     |                                                | FYKEEEKNDPEFAK                | 123-136 | 76.60% |
|     |                                                | GVTTIIGGGDSVAAVEK             | 350-366 | 76.60% |
|     |                                                | IGVIESLLAK                    | 207-216 | 76.60% |
|     |                                                | ITDDTR                        | 36-41   | 76.60% |
| TB2 | Unnamed protein product<br>[Triticum aestivum] | IVPATAIPDGWMGLDVGPDSIK        | 285-306 | 76.60% |
|     |                                                | KLASVADLYVNDAFGTAHR           | 137-155 | 76.60% |
|     |                                                | KPFAAIVGGSK                   | 192-202 | 76.60% |
|     |                                                | LAAALPDGGVLLLENVR             | 106-122 | 76.60% |
|     |                                                | LASVADLYVNDAFGTAHR            | 138-155 | 76.60% |
|     |                                                | LLLPTDVVVADK                  | 265-276 | 76.60% |
|     |                                                | LLLPTDVVVADKFAADAESK          | 265-284 | 76.60% |
|     |                                                | MSHISTGGGASLELLEGKPLPGVLALDEA | 373-401 | 76.60% |
|     |                                                | NDPEFAKK                      | 130-137 | 76.60% |
|     |                                                | QLAELTGK                      | 342-349 | 76.60% |

|     |                                                                    |                                |         |        |
|-----|--------------------------------------------------------------------|--------------------------------|---------|--------|
|     |                                                                    | RSVGTLG EADLK                  | 5-16    | 76.60% |
|     |                                                                    | SLVEEDKLELATS LIETAK           | 241-259 | 76.60% |
|     |                                                                    | SVGTLG EADLK                   | 6-16    | 76.60% |
|     |                                                                    | SVGTLG EADLK GK                | 6-18    | 76.60% |
|     |                                                                    | TFAEALDTTK                     | 307-316 | 76.60% |
|     |                                                                    | TVIWNGPMGVFEFEK                | 317-331 | 76.60% |
|     |                                                                    | VILASHLGR                      | 59-67   | 76.60% |
|     |                                                                    | VILASHLGRPK                    | 59-69   | 76.60% |
| TB2 | Fructose-1,6-<br>biphosphate aldolase<br>12<br>[Triticum aestivum] | AGNVLP GIK                     | 95-103  | 62.60% |
|     |                                                                    | AGNVLP GIKV DK                 | 95-106  | 62.60% |
|     |                                                                    | ALNDQHV LLEG TLLKPNM VTPGSDSK  | 211-236 | 62.60% |
|     |                                                                    | ALNDQHV LLEG TLLKPNM VTPGSDSKK | 211-237 | 62.60% |
|     |                                                                    | ANSEATLG TYK                   | 328-338 | 62.60% |
|     |                                                                    | FASINVENVEDNR                  | 40-52   | 62.60% |
|     |                                                                    | FASINVENVEDNRR                 | 40-53   | 62.60% |
|     |                                                                    | GDATAEGASESLHVK                | 339-354 | 62.60% |
|     |                                                                    | GGKPFVDILK                     | 85-94   | 62.60% |
|     |                                                                    | GILAADESTGTIGK                 | 25-38   | 62.60% |
|     |                                                                    | GILAADESTGTIGKR                | 25-39   | 62.60% |
|     |                                                                    | GTIELAGTNGETTTQGFD DLGK        | 107-128 | 62.60% |
|     |                                                                    | GTIELAGTNGETTTQGFD DLGKR       | 107-129 | 62.60% |
|     |                                                                    | IGATEPSQLSIDQNAQGLAR           | 149-168 | 62.60% |
|     |                                                                    | KPWNL SFSFGR                   | 288-298 | 62.60% |
| TB2 | Fructose-1,6-<br>biphosphate aldolase<br>12<br>[Triticum aestivum] | KVAPEVIAEYTVR                  | 237-249 | 62.60% |
|     |                                                                    | NAAYIGTPGK                     | 15-24   | 62.60% |
|     |                                                                    | PFVDILK                        | 88-94   | 62.60% |
|     |                                                                    | RFASINVENVEDNRR                | 39-53   | 62.60% |
|     |                                                                    | TENEEK                         | 312-317 | 62.60% |
|     |                                                                    | TVPAAVPAIVFLSGGQSEEEATLNLNAMNK | 254-283 | 62.60% |
|     |                                                                    | VAPEVIAEYTVR                   | 238-249 | 62.60% |
|     |                                                                    | VDKGTIELAGTNGETTTQGFD DLGK     | 104-128 | 62.60% |
|     |                                                                    | VDKGTIELAGTNGETTTQGFD DLGKR    | 104-129 | 62.60% |
|     |                                                                    | YKDELIK                        | 8-14    | 62.60% |
|     |                                                                    | AEQMLIH NESR                   | 104-114 | 60.60% |

|     |                                                |                                |         |        |
|-----|------------------------------------------------|--------------------------------|---------|--------|
| TB2 | Unnamed protein product<br>[Triticum aestivum] | ALLPFFDSAYQGFASGSLDKDAQSVR     | 258-283 | 60.60% |
|     |                                                | DSAMFDEWTVELK                  | 354-366 | 60.60% |
|     |                                                | EQLFDALK                       | 377-384 | 60.60% |
|     |                                                | ETPGDWSHIIK                    | 387-397 | 60.60% |
|     |                                                | EYLPITGLADFNK                  | 117-129 | 60.60% |
|     |                                                | IRETPGDWSHIIK                  | 385-397 | 60.60% |
|     |                                                | ISMAGLSSR                      | 429-437 | 60.60% |
|     |                                                | LIFGADSPAIQENR                 | 134-147 | 60.60% |
|     |                                                | LVIRPMYSNPPLHGASIVATILK        | 331-353 | 60.60% |
|     |                                                | MFVADGGELLMAQSYAK              | 284-300 | 60.60% |
|     |                                                | NMGLYGER                       | 301-308 | 60.60% |
|     |                                                | QEYHIYMTSDGR                   | 417-428 | 60.60% |
|     |                                                | TEEGKPLVLNVVK                  | 90-108  | 60.60% |
|     |                                                | TIYIPQPTWGNHPK                 | 175-188 | 60.60% |
|     |                                                | TVPHLADAIHAAVTK                | 438-452 | 60.60% |
|     |                                                | VATVQCLSGTGSLR                 | 148-161 | 60.60% |
|     |                                                | VFTLAGLTAR                     | 189-198 | 60.60% |
|     |                                                | VGALSIVCGSADIAVK               | 309-324 | 60.60% |
|     |                                                | VGGEFLAR                       | 162-169 | 60.60% |
|     |                                                | VKEYLPITGLADFNK                | 115-129 | 60.60% |
|     |                                                | VNLGVGAYR                      | 81-89   | 60.60% |
|     |                                                | YYDPATR                        | 202-208 | 60.60% |
| TB3 | Globulin-3A<br>[Triticum aestivum]             | AFVVPGLTDADGVGYVAQGEGLTVIENGEK | 182-212 | 42.50% |
|     |                                                | ALRPFDEVSR                     | 154-163 | 42.50% |
|     |                                                | ASEEQLR                        | 307-313 | 42.50% |
|     |                                                | DTFNLLEQR                      | 339-347 | 42.50% |
|     |                                                | DTFNLLEQRPK                    | 339-349 | 42.50% |
|     |                                                | FQYFSAKPLLASLSK                | 257-271 | 42.50% |
|     |                                                | GSAFVVPGHPVVEIASSR             | 470-488 | 42.50% |
|     |                                                | HEQEEQGR                       | 74-81   | 42.50% |
|     |                                                | ILHTISVPGK                     | 247-256 | 42.50% |
|     |                                                | LGSLGSR                        | 285-292 | 42.50% |
|     |                                                | QASEGDQGHWWPLPPFR              | 318-334 | 42.50% |
|     |                                                | QGDVIVAPAGSIMHLANTDGR          | 219-239 | 42.50% |

|     |                                   |                                                |         |        |
|-----|-----------------------------------|------------------------------------------------|---------|--------|
|     |                                   | QGDVIVAPAGSIMHLANTDGRR                         | 219-240 | 42.50% |
|     |                                   | QGKEEEEK                                       | 293-300 | 42.50% |
|     |                                   | REQEHGK                                        | 421-427 | 42.50% |
|     |                                   | RPYVFGPR                                       | 132-139 | 42.50% |
|     |                                   | RQASEGDQGHHWPLPPFR                             | 317-334 | 42.50% |
|     |                                   | RVLTAALK                                       | 272-279 | 42.50% |
|     |                                   | SDHGFVK                                        | 147-153 | 42.50% |
|     |                                   | SFHALAQHDVR                                    | 364-374 | 42.50% |
|     |                                   | VAIMEVNPR                                      | 173-181 | 42.50% |
|     |                                   | VAVANITPGSMTAPYLNTQSFK                         | 375-396 | 42.50% |
|     |                                   | WRSEEEEDRR                                     | 430-440 | 42.50% |
| TB4 | Globulin 1<br>[Triticum aestivum] | CAALRGMVR                                      | 90-98   | 80.00% |
|     |                                   | CAALRGMVRDYEQSMPLGEGR                          | 90-111  | 80.00% |
|     |                                   | CCQQLESVSR                                     | 77-86   | 80.00% |
|     |                                   | CCQQLESVSRECR                                  | 77-89   | 80.00% |
|     |                                   | DYEQSMPLGEGR                                   | 99-111  | 80.00% |
|     |                                   | EKPLHACR                                       | 39-46   | 80.00% |
|     |                                   | EKPLHACRQILEQQLTGR                             | 39-56   | 80.00% |
|     |                                   | ERCCQQLESVSR                                   | 75-86   | 80.00% |
|     |                                   | ERCCQQLESVSRECR                                | 75-89   | 80.00% |
|     |                                   | GCSGESTAEQR                                    | 123-133 | 80.00% |
| TB4 | Globulin 1<br>[Triticum aestivum] | GCSGESTAEQRQEVQGGQYGSSETGGSQQQ-<br>GGGYHGVTVGR | 123-162 | 80.00% |
|     |                                   | GEVREKPLHACR                                   | 35-46   | 80.00% |
|     |                                   | GGQRQGQVLCHK                                   | 163-174 | 80.00% |
|     |                                   | GMVRDYEQSMPLGEGR                               | 95-111  | 80.00% |
|     |                                   | HGSSGER                                        | 112-118 | 80.00% |
|     |                                   | HGSSGERQPER                                    | 112-122 | 80.00% |
|     |                                   | HGSSGERQPERGCSGESTAEQR                         | 112-133 | 80.00% |
|     |                                   | IEPQECSVFFADQYY                                | 211-225 | 80.00% |
|     |                                   | LADAQCR                                        | 28-34   | 80.00% |
|     |                                   | LADAQCRGEVR                                    | 28-38   | 80.00% |
|     |                                   | LADAQCRGEVREK                                  | 28-40   | 80.00% |
|     |                                   | LPTACR                                         | 205-210 | 80.00% |

|     |                                    |                                                    |         |        |
|-----|------------------------------------|----------------------------------------------------|---------|--------|
|     |                                    | LPTACRIEPQECSVFFADQYY                              | 205-225 | 80.00% |
|     |                                    | LTKVRLPTACR                                        | 200-210 | 80.00% |
|     |                                    | QEVQGGQYGSSETGGSQQGGGYHGVTVGR                      | 134-162 | 80.00% |
|     |                                    | QGQVLCHK                                           | 167-174 | 80.00% |
|     |                                    | QGQVLCHKRPQR                                       | 167-178 | 80.00% |
|     |                                    | QILEQQLTGR                                         | 47-56   | 80.00% |
|     |                                    | QLESVSR                                            | 80-86   | 80.00% |
|     |                                    | QLESVSRECR                                         | 80-89   | 80.00% |
|     |                                    | QPERGCSGESTAEQR                                    | 119-133 | 80.00% |
|     |                                    | QPERGCSGESTAEQRQEVQGGQYGSSETGGSQQQ-<br>GGGYHGVTVGR | 119-162 | 80.00% |
|     |                                    | QQGEGFSGEGAQQKPQAGR                                | 179-197 | 80.00% |
|     |                                    | QQGEGFSGEGAQQKPQAGRVR                              | 179-199 | 80.00% |
|     |                                    | VRLPTACR                                           | 203-210 | 80.00% |
|     |                                    | VRLPTACRIEPQECSVFFADQYY                            | 203-225 | 80.00% |
|     |                                    | VRLTKVR                                            | 198-204 | 80.00% |
| TB4 | Globulin-3A<br>[Triticum aestivum] | AFVVPGLTDADGVGYVAQGEGLTVIENGEK                     | 182-212 | 65.50% |
|     |                                    | AFVVPGLTDADGVGYVAQGEGLTVIENGEKR                    | 182-213 | 65.50% |
|     |                                    | AKDQQDEGFVAGPEQQQEHER                              | 542-562 | 65.50% |
|     |                                    | AKDQQDEGFVAGPEQQQEHERGDR                           | 542-565 | 65.50% |
| TB4 | Globulin-3A<br>[Triticum aestivum] | ALRPFDEVSR                                         | 154-163 | 65.50% |
|     |                                    | ALRPFDEVSRLLR                                      | 154-166 | 65.50% |
|     |                                    | ASEEQLR                                            | 307-313 | 65.50% |
|     |                                    | ASEEQLRELR                                         | 307-316 | 65.50% |
|     |                                    | ASEEQLRELRR                                        | 307-317 | 65.50% |
|     |                                    | CQQDRPR                                            | 48-54   | 65.50% |
|     |                                    | DSERREQEHGK                                        | 417-427 | 65.50% |
|     |                                    | DTFNLLEQRPK                                        | 339-349 | 65.50% |
|     |                                    | EVQEVFR                                            | 535-541 | 65.50% |
|     |                                    | FQYFSAKPLLASLSK                                    | 257-271 | 65.50% |
|     |                                    | GDSRDTFNLLEQRPK                                    | 335-349 | 65.50% |
|     |                                    | GIRNYR                                             | 167-172 | 65.50% |
|     |                                    | GSAFVPPGHPVVEIASSR                                 | 470-488 | 65.50% |
|     |                                    | GSGSESEEQDQQRVETVR                                 | 446-464 | 65.50% |

|     |                                    |                           |         |        |
|-----|------------------------------------|---------------------------|---------|--------|
|     |                                    | GSSNLQVVCFEINAERNER       | 489-507 | 65.50% |
|     |                                    | GSSNLQVVCFEINAERNERVWLAGR | 489-513 | 65.50% |
|     |                                    | HEQEEQGRGHGR              | 74-85   | 65.50% |
|     |                                    | IANRHGR                   | 350-356 | 65.50% |
|     |                                    | IIRSDHGFVK                | 144-153 | 65.50% |
|     |                                    | ILHTISVPGK                | 247-256 | 65.50% |
|     |                                    | ILHTISVPGKFQYFSAKPLLASLSK | 247-271 | 65.50% |
|     |                                    | LDDPAQELAFGRPAR           | 520-534 | 65.50% |
|     |                                    | LGSLLGSR                  | 285-292 | 65.50% |
|     |                                    | LLRGIR                    | 164-169 | 65.50% |
|     |                                    | LLRGIRNYR                 | 164-172 | 65.50% |
|     |                                    | LYEADAR                   | 357-363 | 65.50% |
|     |                                    | LYEADARSFHALAQHDVR        | 357-374 | 65.50% |
|     |                                    | NNVIAKLDDPAQELAFGRPAR     | 514-534 | 65.50% |
|     |                                    | NYRVAIMEVNPR              | 170-181 | 65.50% |
|     |                                    | QGDVIVAPAGSIMHLANTDGR     | 219-239 | 65.50% |
|     |                                    | QGDVIVAPAGSIMHLANTDGRR    | 219-240 | 65.50% |
|     |                                    | QGKEEEKSISIVR             | 293-306 | 65.50% |
|     |                                    | REQEHGKGR                 | 421-429 | 65.50% |
| TB4 | Globulin-3A<br>[Triticum aestivum] | RGQGEREEQGR               | 102-113 | 65.50% |
|     |                                    | RGSGSESEEQDQQRVETVR       | 445-464 | 65.50% |
|     |                                    | RKLVIK                    | 240-246 | 65.50% |
|     |                                    | RPYVFGPR                  | 132-139 | 65.50% |
|     |                                    | RSYTVR                    | 213-218 | 65.50% |
|     |                                    | RVLTAALK                  | 272-279 | 65.50% |
|     |                                    | SDHGFVK                   | 147-153 | 65.50% |
|     |                                    | SFHALAQHDVR               | 364-374 | 65.50% |
|     |                                    | TSDERLGSLGSR              | 280-292 | 65.50% |
|     |                                    | VAIMEVNPR                 | 173-181 | 65.50% |
|     |                                    | VLTAALK                   | 273-279 | 65.50% |
|     |                                    | VLTAALKTSDER              | 273-284 | 65.50% |
|     |                                    | VLTAALKTSDERLGSLGSR       | 273-292 | 65.50% |
|     |                                    | VSRGSAFVPPGHPVVEIASSR     | 467-488 | 65.50% |
|     |                                    | VWLAGR                    | 508-513 | 65.50% |

|     |                                                     |                                     |         |        |
|-----|-----------------------------------------------------|-------------------------------------|---------|--------|
|     |                                                     | VWLAGRNNVIAK                        | 508-519 | 65.50% |
| TB4 | Alpha amylase inhibitor protein [Triticum aestivum] | CEALRYFIALPVPSQPVDPR                | 96-115  | 78.60% |
|     |                                                     | EMQWDFVR                            | 133-140 | 78.60% |
|     |                                                     | EMQWDFVRLLVAPGQCNLATIHNV            | 133-157 | 78.60% |
|     |                                                     | LLVAPGQCNLATIHNV                    | 141-157 | 78.60% |
|     |                                                     | LPEWMTSASIYSPGKPYLAK                | 61-80   | 78.60% |
|     |                                                     | LYCCQELAEISQQCR                     | 81-95   | 78.60% |
|     |                                                     | LYCCQELAEISQQCRCEALR                | 81-100  | 78.60% |
|     |                                                     | LYCCQELAEISQQCRCEALRYFIALPVPSQPVDPR | 81-115  | 78.60% |
|     |                                                     | SGNVGESGLIDLPGCPR                   | 116-132 | 78.60% |
|     |                                                     | SGNVGESGLIDLPGCPREMQWDFVR           | 116-140 | 78.60% |
|     |                                                     | TNLLPHCR                            | 37-44   | 78.60% |
|     |                                                     | TNLLPHCRDYVLQQTCGTFTPGSK            | 37-60   | 78.60% |
|     |                                                     | YCPAVEQPLWI                         | 158-168 | 78.60% |
|     |                                                     | YFIALPVPSQPVDPR                     | 101-115 | 78.60% |

|     |                                               |                           |          |        |
|-----|-----------------------------------------------|---------------------------|----------|--------|
| TB4 | Endogenous alpha-amylase/subtilisin inhibitor | ATGSGELMAIGGRR            | 27-40    | 89.40% |
|     |                                               | AHGGGLTMAPGHGRR           | 27-41    | 89.40% |
|     |                                               | AYTTCVQSTEWIHIDSELVSGR    | 85-105   | 89.40% |
|     |                                               | AYTTCVQSTEWIHIDSELVSGRR   | 85-106   | 89.40% |
|     |                                               | CPLFVSQEADGQR             | 42-54    | 89.40% |
|     |                                               | CPLFVSQEADGQRDGLPVR       | 42-60    | 89.40% |
|     |                                               | DLKGGAWFLGATEPYHVVVFK     | 155-175  | 89.40% |
|     |                                               | DLKGGAWFLGATEPYHVVVFKK    | 155-176  | 89.40% |
|     |                                               | DPPPVHDTDGNELR            | 1-14     | 89.40% |
|     |                                               | DPPPVHDTDGNELRADANYVLPANR | 1-26     | 89.40% |
|     |                                               | DPSPSGRENAFRIEK           | 115-129  | 89.40% |
|     |                                               | ENAFRIEK                  | 122-129  | 89.40% |
|     |                                               | GGAWFLGATEPYHVVVFK        | 158-175  | 89.40% |
|     |                                               | HVITGPVR                  | 107-1114 | 89.40% |
|     |                                               | HVITGPVRDPSPSGR           | 107-121  | 89.40% |
|     |                                               | HVITGPVRDPSPSGRENAFR      | 107-126  | 89.40% |



|     |                                           |                                                            |         |        |
|-----|-------------------------------------------|------------------------------------------------------------|---------|--------|
|     |                                           | IAPHGGAPSDK                                                | 61-71   | 89.40% |
|     |                                           | IAPHGGAPSDKIIR                                             | 61-74   | 89.40% |
|     |                                           | LSTDVRISFR                                                 | 75-84   | 89.40% |
|     |                                           | RCPLFVSQEADGQR                                             | 41-54   | 89.40% |
|     |                                           | RCPLFVSQEADGQRDGLPVR                                       | 41-60   | 89.40% |
|     |                                           | YSGAEVHEYK                                                 | 130-139 | 89.40% |
| TB4 | Class II chitinase<br>[Triticum aestivum] | AAGRVPGFGVITNIINGGIECGHGQDSR                               | 207-234 | 92.50% |
|     |                                           | AAGRVPGFGVITNIINGGIECGHGQDSRVADR                           | 207-238 | 92.50% |
|     |                                           | AIGVDLLSNPDLVATDPTVSFK                                     | 154-175 | 92.50% |
|     |                                           | AIGVDLLSNPDLVATDPTVSFKTAMWFWMTA-<br>QAPKPSSHAVITGQWSPSGADR | 154-206 | 92.50% |
|     |                                           | AQFDRMLLHR                                                 | 32-41   | 92.50% |
|     |                                           | ARGSVSSVVS                                                 | 21-31   | 92.50% |
|     |                                           | EVA AFLAQTSHETTGGWATAPDGAFWGYCFKQER                        | 79-113  | 92.50% |
|     |                                           | GAASDYCTPSAQWPCAPGKR                                       | 114-133 | 92.50% |
|     |                                           | GFYTYDAFVAAAAFPFGTTGSADAQKR                                | 50-78   | 92.50% |
|     |                                           | GPIQLSHNINYGPAGR                                           | 138-153 | 92.50% |
| TB4 | Class II chitinase<br>[Triticum aestivum] | GSVSSVVS                                                   | 23-31   | 92.50% |
|     |                                           | IGFYKR                                                     | 239-244 | 92.50% |
|     |                                           | MLLHRNDGACQAK                                              | 37-49   | 92.50% |
|     |                                           | NDGACQAK                                                   | 42-49   | 92.50% |
|     |                                           | NDGACQAKGFYTYDAFVAAAAFPFGTTGSADAQKR                        | 42-78   | 92.50% |
|     |                                           | RYCDILGVGYGDNLDCYNQRPFA                                    | 244-266 | 92.50% |
|     |                                           | RYYGRGPIQLSHNINYGPAGR                                      | 133-153 | 92.50% |
|     |                                           | TAMWFWMTAQAPKPSSHAVITGQWSPSGADR                            | 176-206 | 92.50% |
|     |                                           | VADRIGFYK                                                  | 235-243 | 92.50% |
|     |                                           | VADRIGFYKR                                                 | 235-244 | 92.50% |
|     |                                           | VPFGFVITNIINGGIECGHGQDSR                                   | 211-234 | 92.50% |
|     |                                           | VPFGFVITNIINGGIECGHGQDSRVADR                               | 211-238 | 92.50% |
|     |                                           | YCDILGVGYGDNLDCYNQRPFA                                     | 245-266 | 92.50% |
|     |                                           | YYGRGPIQLSHNINYGPAGR                                       | 134-153 | 92.50% |
| TB5 | Globulin-3A<br>[Triticum aestivum]        | AFVVPGLTDADGVGYVAQGEGLTVIENGEK                             | 182-212 | 30.30% |
|     |                                           | AFVVPGLTDADGVGYVAQGEGLTVIENGEKR                            | 182-213 | 30.30% |
|     |                                           | ALRPFDEVSR                                                 | 154-163 | 30.30% |

|     |                                    |                        |         |        |
|-----|------------------------------------|------------------------|---------|--------|
|     |                                    | ASEEQLR                | 307-313 | 30.30% |
|     |                                    | EVQEVFR                | 535-541 | 30.30% |
|     |                                    | FQYFSAKPLLASLSK        | 257-271 | 30.30% |
|     |                                    | GSAFVVPFGHPVVEIASSR    | 470-488 | 30.30% |
|     |                                    | ILHTISVPGK             | 247-256 | 30.30% |
|     |                                    | LGSLLGSR               | 285-292 | 30.30% |
|     |                                    | LVIAKILHTISVPGK        | 242-256 | 30.30% |
|     |                                    | PLLASLSK               | 264-271 | 30.30% |
|     |                                    | QGDVIVAPAGSIMHLANTDGR  | 219-239 | 30.30% |
|     |                                    | QGDVIVAPAGSIMHLANTDGRR | 219-240 | 30.30% |
|     |                                    | RPYVFGPR               | 132-139 | 30.30% |
|     |                                    | RVLTAALK               | 272-279 | 30.30% |
|     |                                    | SDHGFVK                | 147-153 | 30.30% |
|     |                                    | SDHGFVKALRPFDEVSR      | 147-163 | 30.30% |
|     |                                    | SFHALAQHDVR            | 364-374 | 30.30% |
|     |                                    | VAIMEVNPR              | 173-181 | 30.30% |
| TB5 | Globulin-3A<br>[Triticum aestivum] | VLTAAALK               | 273-279 | 30.30% |
