# Supplementary material for: A Mouse-Based Method to Monitor Wheat Allergens in Novel Wheat Lines and Varieties Created by Crossbreeding: Proof-of-Concept Using Durum and A. tauschii Wheats
Source: Int J Mol Sci. 2022 Jun 10;23(12):6505. doi: 10.3390/ijms23126505 (PMC9224339; doi:10.3390/ijms23126505)
Supplement: Supplementary file 1 [file ijms-23-06505-s001.zip]

Archive with 5 entries (5 files):
- Supl_TableS1_TB1-TB5.pdf
- Supl_TableS2_TN1-TN7.pdf
- Supl_TableS3_DB1-DB2.pdf
- Supl_TableS4_DN1-DN3.pdf
- Supplementary Fig S1.pdf
